# Supplementary material for: Temporal trends and differences of SARS-CoV-2-specific antibody responses in symptomatic and asymptomatic subjects: a longitudinal study from Umbria in Italy
Source: PubMed Central journal article supplement — BMJ Open. 2022 Jul 18;12(7):e056370. doi: 10.1136/bmjopen-2021-056370 (PMC9296997; doi:10.1136/bmjopen-2021-056370), 2022-07-18
Supplement: bmjopen-2021-056370.draft_revisions.pdf [file bmjopen-2021-056370.draft_revisions.pdf]

# BMJ Open

BMJ Open is committed to open peer review. As part of this commitment we make the peer review history of every article we publish publicly available.

When an article is published we post the peer reviewers' comments and the authors' responses online. We also post the versions of the paper that were used during peer review. These are the versions that the peer review comments apply to.

The versions of the paper that follow are the versions that were submitted during the peer review process. They are not the versions of record or the final published versions. They should not be cited or distributed as the published version of this manuscript.

BMJ Open is an open access journal and the full, final, typeset and author-corrected version of record of the manuscript is available on our site with no access controls, subscription charges or pay-per-view fees (<http://bmjopen.bmj.com>).

If you have any questions on BMJ Open's open peer review process please email [info.bmjopen@bmj.com](mailto:info.bmjopen@bmj.com)

# BMJ Open

## Antibody response in individuals affected with Sars-Cov-2 infection: temporal trends and qualitative and quantitative differences in symptomatic and asymptomatic subjects. A Cross Sectional Analysis. Ab-Covid Study

|                               |                                                                                                                                                                                                                                                                                                                                                                                                                                                                                                                                                                                                                                                                                                                                                                                                                                                                                                                                                                                                                                                                                                                                                                                                                                                                                                                                                                                                                                                                                                  |
|-------------------------------|--------------------------------------------------------------------------------------------------------------------------------------------------------------------------------------------------------------------------------------------------------------------------------------------------------------------------------------------------------------------------------------------------------------------------------------------------------------------------------------------------------------------------------------------------------------------------------------------------------------------------------------------------------------------------------------------------------------------------------------------------------------------------------------------------------------------------------------------------------------------------------------------------------------------------------------------------------------------------------------------------------------------------------------------------------------------------------------------------------------------------------------------------------------------------------------------------------------------------------------------------------------------------------------------------------------------------------------------------------------------------------------------------------------------------------------------------------------------------------------------------|
| Journal:                      | <i>BMJ Open</i>                                                                                                                                                                                                                                                                                                                                                                                                                                                                                                                                                                                                                                                                                                                                                                                                                                                                                                                                                                                                                                                                                                                                                                                                                                                                                                                                                                                                                                                                                  |
| Manuscript ID                 | bmjopen-2021-056370                                                                                                                                                                                                                                                                                                                                                                                                                                                                                                                                                                                                                                                                                                                                                                                                                                                                                                                                                                                                                                                                                                                                                                                                                                                                                                                                                                                                                                                                              |
| Article Type:                 | Original research                                                                                                                                                                                                                                                                                                                                                                                                                                                                                                                                                                                                                                                                                                                                                                                                                                                                                                                                                                                                                                                                                                                                                                                                                                                                                                                                                                                                                                                                                |
| Date Submitted by the Author: | 17-Aug-2021                                                                                                                                                                                                                                                                                                                                                                                                                                                                                                                                                                                                                                                                                                                                                                                                                                                                                                                                                                                                                                                                                                                                                                                                                                                                                                                                                                                                                                                                                      |
| Complete List of Authors:     | <p>Abraha, Iosief; Azienda Unità Sanitaria Locale Umbria 2, Servizio Immunotrasfusionale</p> <p>Germani, Antonella; Azienda Unità Sanitaria Locale Umbria 2, Servizio Immunotrasfusionale</p> <p>Pasquarelli, Erica; Azienda Unità Sanitaria Locale Umbria 2, Servizio Immunotrasfusionale</p> <p>Pascolini, Sofia; Azienda Unità Sanitaria Locale Umbria 2, Servizio Immunotrasfusionale</p> <p>Antonietti, Rossana; Azienda Unità Sanitaria Locale Umbria 2, Servizio Immunotrasfusionale</p> <p>Argenti, Sandro; Azienda Unità Sanitaria Locale Umbria 2, Servizio Immunotrasfusionale</p> <p>Fioravanti, Alessandra; Azienda Unità Sanitaria Locale Umbria 2, Servizio Immunotrasfusionale</p> <p>Martini, Elisa; Azienda Unità Sanitaria Locale Umbria 2, Servizio Immunotrasfusionale</p> <p>Aristei, Luana; Azienda Unità Sanitaria Locale Umbria 2, Servizio Immunotrasfusionale</p> <p>Mancinelli, Paola; Azienda Unità Sanitaria Locale Umbria 2, Servizio Immunotrasfusionale</p> <p>Ottaviani, Maria Letizia; Azienda Unità Sanitaria Locale Umbria 2, Servizio Immunotrasfusionale</p> <p>Roselli, Martina; Azienda Unità Sanitaria Locale Umbria 2, Servizio Immunotrasfusionale</p> <p>Barzacca, Milena; Azienda Unità Sanitaria Locale Umbria 2, Servizio Immunotrasfusionale</p> <p>Belardinelli, Erika; Azienda Unità Sanitaria Locale Umbria 2, Servizio Immunotrasfusionale</p> <p>Micheli, Marta; Azienda Unità Sanitaria Locale Umbria 2, Servizio Immunotrasfusionale</p> |
| Keywords:                     | INFECTIOUS DISEASES, COVID-19, VIROLOGY, IMMUNOLOGY                                                                                                                                                                                                                                                                                                                                                                                                                                                                                                                                                                                                                                                                                                                                                                                                                                                                                                                                                                                                                                                                                                                                                                                                                                                                                                                                                                                                                                              |
|                               |                                                                                                                                                                                                                                                                                                                                                                                                                                                                                                                                                                                                                                                                                                                                                                                                                                                                                                                                                                                                                                                                                                                                                                                                                                                                                                                                                                                                                                                                                                  |

1  
2  
3  
4  
5  
6  
7  
8  
9  
10  
11  
12  
13  
14  
15  
16  
17  
18  
19  
20  
21  
22  
23  
24  
25  
26  
27  
28  
29  
30  
31  
32  
33  
34  
35  
36  
37  
38  
39  
40  
41  
42  
43  
44  
45  
46  
47  
48  
49  
50  
51  
52  
53  
54  
55  
56  
57  
58  
59  
60

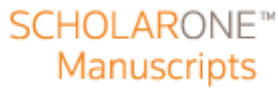

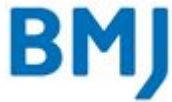

I, the Submitting Author has the right to grant and does grant on behalf of all authors of the Work (as defined in the below author licence), an exclusive licence and/or a non-exclusive licence for contributions from authors who are: i) UK Crown employees; ii) where BMJ has agreed a CC-BY licence shall apply, and/or iii) in accordance with the terms applicable for US Federal Government officers or employees acting as part of their official duties; on a worldwide, perpetual, irrevocable, royalty-free basis to BMJ Publishing Group Ltd ("BMJ") its licensees and where the relevant Journal is co-owned by BMJ to the co-owners of the Journal, to publish the Work in this journal and any other BMJ products and to exploit all rights, as set out in our [licence](#).

The Submitting Author accepts and understands that any supply made under these terms is made by BMJ to the Submitting Author unless you are acting as an employee on behalf of your employer or a postgraduate student of an affiliated institution which is paying any applicable article publishing charge ("APC") for Open Access articles. Where the Submitting Author wishes to make the Work available on an Open Access basis (and intends to pay the relevant APC), the terms of reuse of such Open Access shall be governed by a Creative Commons licence – details of these licences and which [Creative Commons](#) licence will apply to this Work are set out in our licence referred to above.

Other than as permitted in any relevant BMJ Author's Self Archiving Policies, I confirm this Work has not been accepted for publication elsewhere, is not being considered for publication elsewhere and does not duplicate material already published. I confirm all authors consent to publication of this Work and authorise the granting of this licence.

# Antibody response in individuals affected with Sars-Cov-2 infection: temporal trends and qualitative and quantitative differences in symptomatic and asymptomatic subjects. A Cross Sectional Analysis. Ab-Covid Study

Iosief Abraha<sup>1</sup>, Antonella Germani<sup>1</sup>, Erica Pasquarelli<sup>1</sup>, Sofia Pascolini<sup>1</sup>, Rossana Antonietti<sup>1</sup>, Sandro Argenti<sup>1</sup>, Alessandra Fioravanti<sup>1</sup>, Elisa Martini<sup>1</sup>, Luana Aristei<sup>1</sup>, Paola Mancinelli<sup>1</sup>, Maria Letizia Ottaviani<sup>1</sup>, Martina Roselli<sup>1</sup>, Milena Barzacca<sup>1</sup>, Erika Belardinelli<sup>1</sup>, Marta Micheli<sup>1</sup>

Correspondence to: Dr. Iosief Abraha; [iosief\\_a@yahoo.it](mailto:iosief_a@yahoo.it)

1 Servizio Immunotrasfusionale

Azienda USL Umbria 2

Foligno

## Abstract

**Objectives** To describe clinical characteristics and treatment used in subjects who had Sars-Cov-2 infection during the first pandemic and to assess the correlation between serological titers and clinical characteristics; to evaluate the persistence of antibody titer.

**Design** Cross-sectional study; 12 months follow-up.

**Setting** Residents in Azienda USL Umbria 2.

**Participants** Consecutive subjects aged 15 to 75 who were discharged with the diagnosis of Sars-Cov-2 from the hospitals of the AUSL Umbria 2, or resulted positive to a PCR test for Sars-Cov-2 infection with or without symptoms. SARS-CoV-2 serologic testing for antibodies targeting the Nucleocapside and Spike proteins were determined.

**Results** Of 184 eligible subjects, 149 were available for evaluation: 17 were classified as Oligo/asymptomatic, 107 as Symptomatic, 25 as Hospital admitted. While fever resulted common to all the groups, headache or musculoskeletal pain was common to symptomatic participants whereas cough and dyspnea was present in all the hospital admitted. Participants with significant signs and symptoms were more likely to use antibiotics, hydroxychloroquine, heparin and steroids.

1  
2  
3 Compared to Oligo/asymptomatic participants, Symptomatic and Hospital admitted participants had  
4  
5 higher levels of anti-S titers at every follow-up (median titer at 12 month follow-up: 29 vs 94 vs  
6  
7 116 respectively;  $P < 0.001$ ). At 12 months follow-up, anti-S titers persisted above the threshold for  
8  
9 at least 12 months in all Hospital admitted participants, in 90% of the Symptomatic participants and  
10  
11 83% in the oligo/asymptomatic participants; in 30% of participants the titer raised significantly  
12  
13 probably due to reinfection. Anti-N antibody titer tended to decrease over time and in 62% of the  
14  
15 entire cohort resulted negative. None of the participants reported clinical reinfection with Sars-  
16  
17 Cov-2 virus.  
18  
19

20  
21 **Conclusion** - Anti-S and anti-N antibody titers correlates well with disease severity. Anti-S  
22  
23 antibodies persist for at least one year and most probably provide protection from reinfection.  
24  
25  
26

#### 27 28 Strengths and limitations of this study

- 29  
30  
31 ▪ The key strength of this study is the evaluation of anti-Sars-Cov-2 serology  
32 using two types of serological assays and the follow-up that endured for at  
33 least 12 months
- 34  
35 ▪ In addition to serological evaluation participants were also followed-up  
36 clinically
- 37  
38 ▪ The study does not have a baseline serologic testing since it was conceived  
39 in late April when most of the participants were discharged from hospital or  
40 had their symptoms resolved
- 41  
42 ▪ The study lacks clinical and serological information regarding those who died  
43 during the pandemic event, hence we are unable to conclude whether  
44 quantitative serologic testing could predict survival  
45  
46  
47  
48  
49  
50  
51  
52  
53  
54  
55  
56  
57  
58  
59  
60

## Background

The novel acute respiratory syndrome coronavirus 2 (SARS-CoV-2) virus has caused a pandemic infection known as COVID-19. The disease is associated with severe morbidity and mortality, currently threatening global health as well as economy. The disease presents important challenges in different settings including prevention, treatment as well as diagnostic and prognostic significance based on immune response.

The diagnosis of COVID-19 disease depends much on clinical or epidemiological context though it is mainly based on the molecular testing of symptomatic subjects. However, false-negative PCR results are not infrequent and a significant proportion of infected people might remain asymptomatic [1-4]. Unlike the nasopharyngeal RT-PCR tests, the antibody tests allow for better collection of epidemiological data, determination of the immune status of asymptomatic individuals, and screening of previous exposure [5]. Hence, Covid-19 serologic tests, despite their limitation and somewhat challenging performance characteristics, can be an appropriate tool to better diagnose recent or past infection [4]. Use of antibody testing in the context of SARS-CoV-2 infection is being encouraged also to assess the presence of immunity for SARS-CoV-2 infection, to prevent the spread of the diseases [6] as well as to identify people with secure immunity in order to make them return to work [7]. Additionally, serological diagnosis is becoming an important tool to understand the extent of COVID-19 in the community [8] including to estimate true prevalence of the disease. A cross-sectional study in a random sample of blood donors estimated showed that 4.6% of healthy adults were already positive for Sars-Cov-2 antibodies[9].

Studies showed that within 5 days of Sars-Cov-2 infection, the IgM antibodies increase from 50% to 81%, whereas the IgG antibodies increase from 81% to 100%[10, 11]. World Health Organization guidelines recommend obtaining a blood sample during the first week of illness and then 3 to 4 weeks later to measure SARS-CoV-2 antibodies[11, 12].

Serologic tests have been introduced to detect antigens namely the spike protein (S), the protein nucleocapside (N) and the virus membrane[6]. N and S proteins were found to be the major

1  
2  
3 immunogenic proteins [13]. As in the MERS-CoV infection, antibodies against proteins S, 3a, N,  
4 and 9b were detected in the sera from convalescent-phase SARS patients [13]. Though anti-S and  
5  
6 and 9b were detected in the sera from convalescent-phase SARS patients [13]. Though anti-S and  
7  
8 anti-N were dominant and could persist in the sera of SARS patients until week 30, only anti-S3  
9  
10 demonstrated significant neutralizing activity [13].  
11

12 Current methods available for serologic testing include rapid diagnostic tests (RDT), enzyme-linked  
13  
14 immunosorbent assays (ELISA), neutralization assays, and chemiluminescent immunoassays  
15  
16 (CLIA) [6]. ELISA and CLIA are considered suitable for first line screening because of the large  
17  
18 throughput, short processing time, and simple operating procedure [11].  
19

20  
21 A Cochrane review evaluated the diagnostic accuracy of antibody tests to determine whether a  
22  
23 person presenting in the community or in primary or secondary care has SARS-CoV-2 infection, or  
24  
25 has previously had SARS-CoV-2 infection [14]. The reference standards for comparing these  
26  
27 antibody tests were RT-PCR tests and clinical diagnosis based. After excluding several studies due  
28  
29 to relevant bias, the authors analyzed 19 studies and concluded antibody tests are likely to have a  
30  
31 useful role for detecting previous SARS-CoV-2 infection if used 15 (sensitivity 91%; 95% CI 87 to  
32  
33 94) or more days after the onset of symptoms [14].  
34  
35  
36

37 In addition to antibody profile, longitudinal persistence of immunity in convalescent Covid-19  
38  
39 subjects has been another issue of debate for months after the first pandemic. An observational  
40  
41 study published during that pandemic [15] found in 23 patients a positive correlation between  
42  
43 enzyme immunoassay antibodies and neutralizing antibody titer but concluded that further  
44  
45 investigation is needed on the role of anti-COVID antibodies in immunopathology and / or antiviral  
46  
47 treatment [15].  
48  
49

50  
51 We performed a longitudinal cohort study in Umbria of subjects with a confirmed diagnosis of  
52  
53 Sars-Cov-2 between February and April 2020 with a follow-up of at least 12 months. Levels of IgG  
54  
55 antibodies against SARS-CoV-2 Nucleocapside (N), and neutralizing antibodies were determined.  
56  
57

58  
59 The objectives of our study was to describe clinical characteristics and treatment used in subjects  
60  
who had Sars-Cov-2 infection during the first pandemic; to assess the correlation between



1  
2  
3  
4  
5  
6  
7  
8  
9  
10  
11  
12  
13  
14  
15  
16  
17  
18  
19  
20  
21  
22  
23  
24  
25  
26  
27  
28  
29  
30  
31  
32  
33  
34  
35  
36  
37  
38  
39  
40  
41  
42  
43  
44  
45  
46  
47  
48  
49  
50  
51  
52  
53  
54  
55  
56  
57  
58  
59  
60

serological titers and clinical characteristics; to evaluate the persistence and trend of anti-Sars-Cov-2 titers over a follow-up of 12.

For peer review only

## Methods

### Study design and target population

The present study was a cross-sectional in design. Our cohort of interest was characterized of consecutive subjects aged 15 to 75 who from February, 2020, to April 2021, (a) were discharged with the diagnosis of Sars-Cov-2 from the hospitals of the AUSL Umbria 2, or (b) resulted positive to a PCR test for Sars-Cov-2 infection. These subjects were invited to undertake a serologic SARS-CoV-2 testing for antibodies targeting the Nucleocapside (N) protein and S proteins of SARS-CoV-2. All the cohort was clinically and serologically followed-up longitudinally. After enrollment, serology testing were performed every 3-4 months for every participants until end of follow-up. Clinical signs and symptoms as well as specific COVID-19 treatments were recorded at baseline and during follow-up.

### Laboratory methods

Serum samples were analyzed using two commercial serologic assays: Abbott SARS-CoV-2 IgG, DiaSorin Liaison SARS-CoV-2 S1/S2 IgG.

The qualitative detection of anti-N IgG was performed using a chemiluminescent microparticle immunoassay (Abbott ARCHITECT SARS-CoV-2 IgG). A signal/cut-off ratio of  $\geq 1.4$  was interpreted as reactive according to the manufacturer's instructions [16]. Studies report that clinical sensitivity is time-dependent and after day-14 it ranges between 84.2–100% whereas specificity results 99.6%-100%[17, 18]. Prior to analyses of patient samples, calibration was performed and negative quality control signal/cut-off ratio  $\leq 0.78$  and positive quality control signal/cut-off ratio 1.65–8.40 were achieved.

The quantitative detection of anti-S IgG was evaluated using a standardized automated chemiluminescent assay (DiaSorin S.p.A., Saluggia, Italy). A detection of  $\geq 12$  AU/ml was interpreted as positive according to the manufacturer's instructions [19]. The test's sensitivity is

1  
2  
3 time-dependent, that is 25% in the first 5 days after RT-PCR-confirmed diagnosis, 90% from day 5  
4  
5 to day 15, and 97% from day-15 forward.  
6  
7

## 8 **Statistical analysis**

9  
10 Demographic characteristics of the study participants was described by calculating the frequencies  
11 and percentages for categorical variables, and medians and inter-quartile intervals for continuous  
12 variables. The analysis of the normal distribution of the sample was evaluated using the  
13 Kolmogorov - Smirnov test using STATA software, with the significance level at  $P < 0.05$ .  
14  
15  
16  
17

18  
19 To compare antibody titers among the study groups analysis of variance (ANOVA) was planned for  
20 comparison of means when parametric criteria were reached; for non-parametric distributions, we  
21 used the U-Mann–Whitney and Kruskal–Wallis tests. We used the regression analysis to adjust for  
22 statistical significance for multiple comparisons and to account for potential confounding factors  
23 (e.g., age,sex).  
24  
25  
26  
27  
28  
29

30 Differences between proportions were evaluated by  $\chi^2$  tests. We calculated 95% CIs, and P values  
31  $< 0.05$  were considered statistically significant throughout the analysis.  
32  
33  
34

35 No imputation was performed for missing data.  
36  
37  
38

## 39 **Ethics statement**

40  
41 The planning conduct and reporting was performed in accordance with the Declaration of Helsinki,  
42 as revised in 2013. This study was approved by the Comitato Etico Regionale – Umbria. The  
43 approval number is CER 3695/20). Written informed consent was obtained.  
44  
45  
46  
47  
48  
49

## 50 **Patient and Public Involvement**

51 No patient involved  
52  
53  
54  
55  
56  
57  
58  
59  
60

## Results

184 potentially eligible subjects were identified. After excluding 35 subjects with reasons 149 met the inclusion criteria and signed the informed consent. Of this cohort 21 were not available to perform the serologic test at the 2<sup>nd</sup> follow-up but 19 of these returned for the last follow-up. Subsequently, 14 subjects received anti-Covid vaccination and 6 were unavailable for serologic testing and were excluded from analysis. At 12 months follow-up 130 participants were still available for clinical and serologic evaluation. All of the excluded subjects at final follow-up were traceable through telephone contact and were possible to obtain the their health status. **Figure 1** shows the study screen process.

Of the initial cohort, 17 (11%) were oligo/asymptomatic, 107 (72%) were symptomatic participants (without hospital admission), 25 (17%) were participants who were admitted to hospital. The mean age was 49 years (median 54). While 52% of the cohort were female, men tended to have more severe symptoms reaching 80% of the Hospital admitted participants (**Table 1**).

**Table 1.** Basic characteristic of the cohort classified by symptom severity.

|                                    | Oligo/asymptomatic participants | Symptomatic participants | Hospital admitted participants |
|------------------------------------|---------------------------------|--------------------------|--------------------------------|
| N (%)                              | 17 (11)                         | 107 (71)                 | 25 (16)                        |
| Male (%)                           | 11 (64)                         | 40 (37)                  | 20 (80)                        |
| Age (median; p25, p75)             | 42 (33 – 57)                    | 53 (39 – 59)             | 56 (54-64)                     |
| <b>Clinical signs and symptoms</b> |                                 |                          |                                |
| Fever                              | 7 (44)                          | 94 (83)                  | 23 (92)                        |
| Headache/musculoskeletal pain      | 3 (19)                          | 58 (51)                  | 11 (44)                        |
| Ageusia/anosmia                    | 7 (43)                          | 59 (52)                  | 3 (12)                         |
| Asthenia                           | 1 (6)                           | 59 (52)                  | 8 (32)                         |
| Cough                              | 0 (0)                           | 43 (38)                  | 23 (92)                        |
| Dyspnea                            | 0 (0)                           | 17 (15)                  | 25 (100)                       |
| Pneumonia                          | 0 (0)                           | 3 (3)                    | 25 (100)                       |
| <b>Treatment</b>                   |                                 |                          |                                |
| Antibiotic                         | 0 (0)                           | 28 (25)                  | 25 (100)                       |
| Hydroxychloroquine                 | 0 (0)                           | 12 (10)                  | 25 (75)                        |

|                     |       |         |         |
|---------------------|-------|---------|---------|
| Heparin             | 0 (0) | 1 (1)   | 24 (96) |
| Antiviral           | 0 (0) | 0 (0)   | 8 (32)  |
| Monoclonal antibody | 0 (0) | 0 (0)   | 4 (16)  |
| Steroids            | 0 (0) | 14 (13) | 5 (20)  |
| NSAIDS              | 0 (0) | 7 (6)   | 0 (21)  |
| Paracetamol         | 1 (6) | 20 (18) | 1 (4)   |

## Type and duration of symptoms

The most common symptom was fever which resulted common to all the three groups. Headache or musculoskeletal pain was common to symptomatic participants whereas cough and dyspnea was present in all of the admitted participants indicating the severity of the disease. All hospital admitted participants had radiographically documented pneumonia (**Table 1**).

The most persistent symptoms were asthenia (median 30 days) as well as anosmia and/or ageusia (median 30 days). Anosmia/ageusia persisted across the three groups and the median symptoms' duration increased as severity of symptoms increased (median: 6 days in Oligo/asymptomatic participants, 20 days in Symptomatic participants, 30 days in Hospital admitted participants).

Similarly, median duration for asthenia was 20 days in the Oligo/asymptomatic participants, 30 days in Symptomatic participants, and 25 days in Hospital admitted participants. In 35 patients, anosmia/ageusia lasted for more than 6 months but resolved completely within 10 months. Duration of symptoms across the three groups of participants are depicted in **Figure 2**. Duration of ageusia/anosmia and asthenia resulted higher in females than in males.

## Treatment used

Most of the Oligo/asymptomatic participants were not treated or reported the use of paracetamol or anti-inflammatory agents. Anti-inflammatory agents were most used in Symptomatic participants.

Twenty-five percent of Symptomatic participants and 100% of Hospital admitted participants used antibiotics. Hydroxychloroquine was used by 10% of the Symptomatic participants and by 100% of Hospital admitted participants. Low-dose heparin was almost exclusively used by hospitalized

participants. Antivirals and monoclonal antibodies were used in the 32% and 16% of the hospitalized patients, respectively (**Table 1**).

### Serological outline – Anti-Spike

The median value of the antibody anti-S (Diasorin) titer at first visit (that is between June and September 2020) across the whole cohort was 74 U/ml (IQR 92). The median anti-S titer was 74 U/ml, (IQR 105) in males and 71 U/ml (IQR 83) in females.

Anti-S antibody values differed significantly across the three groups of participants. At first time follow-up, median titers in the symptomatic and hospital admitted participants were significantly higher compared to the oligo/asymptomatic participants; similarly, anti-S titer levels were higher in the Hospital admitted participants compared to Symptomatic subjects indicating that the more significant were the clinical signs and symptoms the higher was the anti-S antibody response. At subsequent follow-up the median titer of anti-S antibodies resulted substantially similar with respect to the values observed at first visit and the statistical difference within groups remained constant overtime (**Table 2**). **Figure 3** shows difference of anti-S antibody titers between groups of participants in each periods of follow-up.

**Table 2.** Median (interquartile range) Anti-N and Anti-S titers according to clinical classification of participants

|                                                 | Oligo/asymptomatic participants | Symptomatic participants | Hospital admitted participants | Non-parametric test |
|-------------------------------------------------|---------------------------------|--------------------------|--------------------------------|---------------------|
| <b>Anti-Spike serology</b>                      |                                 |                          |                                |                     |
| <i>1<sup>st</sup> follow-up</i><br><i>N=149</i> | 18 (12, 85)                     | 68 (36, 115)             | 135 (84, 259)                  | P < 0.001           |
| <i>2<sup>nd</sup> follow-up</i><br><i>N=128</i> | 16 (10, 85)                     | 69 (31, 118)             | 138 (93, 208)                  | P < 0.001           |
| <i>Last follow-up</i><br><i>N=130</i>           | 29 (16, 92)                     | 94 (33, 205)             | 116 (81, 216)                  | P < 0.001           |
| <b>Anti-Nucleocapside serology</b>              |                                 |                          |                                |                     |
| <i>1<sup>st</sup> follow-up</i><br><i>N=149</i> | 2.31 (0.62, 3.87)               | 3.03 (1.26, 4.77)        | 4.55 (2.89, 6.02)              | P = 0.094           |

1  
2  
3  
4  
5  
6  
7  
8  
9  
10  
11  
12  
13  
14  
15  
16  
17  
18  
19  
20  
21  
22  
23  
24  
25  
26  
27  
28  
29  
30  
31  
32  
33  
34  
35  
36  
37  
38  
39  
40  
41  
42  
43  
44  
45  
46  
47  
48  
49  
50  
51  
52  
53  
54  
55  
56  
57  
58  
59  
60

|                                                 |                   |                   |                      |           |
|-------------------------------------------------|-------------------|-------------------|----------------------|-----------|
| <i>2<sup>nd</sup> follow-up</i><br><i>N=128</i> | 0.8 (0.34, 2.99)  | 1.32 (0.54, 2.44) | 2.35<br>(1.75,4.22)  | P = 0.056 |
| <i>Last follow-up</i><br><i>N=130</i>           | 0.34 (0.23, 0.88) | 0.77 (0.33, 1.81) | 1.32 (0.69,<br>2.97) | P = 0.36  |

In addition, percentage difference between the first and second follow-up and between the first and last follow-up were calculated where antibody titers were considered increased (or decreased) when there was at least a 10% increase (or decrease) in the percentage difference. Between the first and second follow-up there was an increase in the anti-S titer by 35% in each of the symptomatic and hospital admitted participants in contrast to 19% in the oligo/asymptomatic participants. During this period of observation in 25% of the overall cohort the anti-Spike titer remained constant maintaining a range between -10% and +10% (**Table 3**).

Interestingly, difference between the first and last follow-up showed an increase in the anti-S titer in around 47% of the symptomatic participants and 50% of the Hospital admitted participants in contrast to 17% of the Oligo/asymptomatic participants. During the whole period of observation 67% the anti-S titer remained stable or increased (**Table 3**).

The decrease of the difference in percentage of the titer between the first and the last follow-up by at least 10% was observed in 33% of the whole cohort. Nonetheless the subjects that showed an anti-S titer below the threshold of 12 U/ml was less than 10% of the available cohort: 9.4% at first follow-up, 8,6% at the second and 9,2% at the third. Most of these events occurred in the oligo/asymptomatic participants whereas none of the hospital admitted subjects had their antibody titer below threshold (**Table 4**).

**Table 3.** Percentage difference and median of anti-Spike and anti-Nucleocapside titers between first and second follow-up, between first and last follow-up

|                                                                                  | Oligo/asymptomatic participants | Symptomatic participants | Hospital admitted participants | All        |
|----------------------------------------------------------------------------------|---------------------------------|--------------------------|--------------------------------|------------|
| <b>Anti-Spike antibody difference between first and second follow-up</b>         |                                 |                          |                                |            |
| <b>Median (IQR)</b>                                                              | -9.5 (21.4)                     | 0 (46.7)                 | -10 (57.1)                     | -2 (50.8)  |
| <b>&gt;10</b>                                                                    | 3 (19)                          | 32 (35)                  | 7 (35)                         | 42 (33)    |
| <b>- 10 to +10</b>                                                               | 6 (38)                          | 23 (25)                  | 3 (15)                         | 32 (25)    |
| <b>&lt; -10</b>                                                                  | 7 (44)                          | 37 (40)                  | 10 (50)                        | 54 (42)    |
| <b>Anti-Spike antibody difference between first and last follow-up</b>           |                                 |                          |                                |            |
| <b>Median (IQR)</b>                                                              | -19.7 (52.5)                    | 9 (88.8)                 | 9.3 (43.7)                     | 8.1 (78.6) |
| <b>&gt;10</b>                                                                    | 2 (17)                          | 44 (47)                  | 12 (50)                        | 52 (45)    |
| <b>- 10 to +10</b>                                                               | 5 (42)                          | 19 (20)                  | 5 (21)                         | 22 (22)    |
| <b>&lt; -10</b>                                                                  | 5 (42)                          | 31 (33)                  | 7 (29)                         | 39 (33)    |
| <b>Anti-Nucleocapside antibody difference between first and second follow-up</b> |                                 |                          |                                |            |
| <b>Median (IQR)</b>                                                              | -65 (69)                        | -105 (144)               | -87.9 (102)                    | -100 (123) |
| <b>&gt;10</b>                                                                    | 4 (25)                          | 6 (7)                    | 1 (5)                          | 11 (9)     |
| <b>- 10 to +10</b>                                                               | 1 (6)                           | 6 (7)                    | 2 (10)                         | 9 (7)      |
| <b>&lt; -10</b>                                                                  | 11 (69)                         | 80 (87)                  | 17 (85)                        | 108 (84)   |
| <b>Anti-Nucleocapside antibody difference between first and last follow-up</b>   |                                 |                          |                                |            |
| <b>Median (IQR)</b>                                                              | -366 (550)                      | -217 (336)               | -222.7 (317)                   | -220 (352) |
| <b>&gt;10</b>                                                                    | 0 (0)                           | 1 (1)                    | 0 (0)                          | 1 (1)      |
| <b>- 10 to +10</b>                                                               | 2 (17)                          | 18 (19)                  | 4 (17)                         | 24 (18)    |
| <b>&lt; -10</b>                                                                  | 10 (83)                         | 75 (80)                  | 20 (83)                        | 105 (81)   |



## Serological outline – Anti-Nucleocapside

The median value of the antibody anti-N titer at first visit across the whole cohort was 3.1 U/ml (IQR 3.63) with non-significant higher values in males (3.75 U/ml, IQR 3.93) than females (2.46 U/ml, IQR 3.33).

Antibody values were higher in the hospital admitted participants compared to the other two groups at every follow-up time but with no statistically significant difference (**Table 2**). In addition, in every group of participants the antibody titer reduced constantly overtime. When anti-N titer was compared within groups, there appears to be a downward trend across the groups during the whole period of follow-up (**Table 3**).

Difference in percentage of anti-N titer between the first and second follow-up and between the first and last follow-up showed a substantial decrease in the serologic titer across the three groups of participants (**Table 3**). The percentage of the subjects with serologic titer under threshold (< 1.4 U/ml) increased from 26% to 62%. This increase was higher in the oligo/asymptomatic and symptomatic participants (**Table 4**).

**Table 4.** Non-persistence of Anti-N and Anti-S antibodies and according to clinical classification of participants

|                                                                  | Oligo/asymptomatic participants (N=17) | Symptomatic participants | Hospital admitted participants | P (Chi <sup>2</sup> -test) |
|------------------------------------------------------------------|----------------------------------------|--------------------------|--------------------------------|----------------------------|
| <b>Subjects with anti-Spike titer &lt;12 u/ml (N,%)</b>          |                                        |                          |                                |                            |
| <b>1<sup>st</sup> follow-up</b><br><b>N=149</b>                  | 5 (29)                                 | 9 (8)                    | 0 (0)                          | 0.016                      |
| <b>2<sup>nd</sup> follow-up</b><br><b>N=128</b>                  | 4 (25)                                 | 7 (7)                    | 0 (0)                          | 0.009                      |
| <b>Last follow-up</b><br><b>N=130</b>                            | 2 (17)                                 | 10 (11)                  | 0 (0)                          | 0.150                      |
| <b>Subjects with anti-Nucleocapside titer &lt;1.4 u/ml (N,%)</b> |                                        |                          |                                |                            |
| <b>1<sup>st</sup> follow-up</b><br><b>N=149</b>                  | 7 (41)                                 | 28 (26)                  | 2 (8)                          | 0.042                      |
| <b>2<sup>nd</sup> follow-up</b><br><b>N=128</b>                  | 7 (63)                                 | 40 (53)                  | 4 (20)                         | 0.018                      |
| <b>Last follow-up</b><br><b>N=130</b>                            | 10 (83)                                | 58 (62)                  | 12 (50)                        | 0.359                      |

## Clinical follow-up

During serologic follow-up participants underwent a clinical visit. When participants were not available for clinical visit their health status was ascertained through telephone call. Particular attention was provided to those who had their anti-S titer augmented. None of the participants in any of the group had any sign or symptom that could be attributed to a possible Sars-Cov-2 reinfection.

For peer review only

## Discussion

We enrolled a substantial number of subjects to whom a diagnosis of Sars-Cov-2 was made during the first pandemic episode within the area of Local Health Unit 2 of Umbria where the main hospitals to which participants had access were Foligno, Spoleto and Orvieto. Participants were invited to sign a consent and to undergo a serologic test, together with a clinical visit every three to four months. Participants were classified according to clinical severity to asymptomatic or paucisymptomatic group, symptomatic subjects with no history of hospital admission and symptomatic subjects with history of hospital admission. Paucisymptomatic subjects were defined according to symptoms that lasted for less than 3 days or when only a non-acute symptom (ageusia-anosmia or asthenia) persisted for less than 15 days. Participants that were admitted to hospital had more severe symptoms that include persistent cough and dyspnea and had radiologically ground glass interstitial pneumonia.

Our study showed also that anti-S antibody response was significantly higher in patients who had noteworthy symptoms. In particular, subjects that were admitted to hospital or had documented pneumonia showed significant levels of antibody titer with a median that was higher than 100 U/ml compared to participants who belong to the other two groups. These results are in agreement with several studies published in medical literature. Compared to hospitalized patients with severe illness, nonhospitalized patients with mild disease typically have lower levels of antibodies than hospitalized patients with severe illness[20-22]. The highest antibody titers observed in severely ill participants might explained in that severe disease is associated with uncontrolled inflammation and significant viral replication stimulates excessive production of antibodies. A study that evaluated antibody responses in 113 patients with Sars-Cov-2 found that the most severely affected patients, in addition of exhibiting high anti-spike antibody levels, showed also the highest levels of inflammatory markers and pro-inflammatory cytokine signatures[23].

1  
2  
3 Differences in antibody response between individuals may be determined also in part by differences  
4 in antigen exposure, age and gender. In a study that evaluated humoral immune response in 126  
5 potential convalescent plasma donors, the authors found that male sex, older age, and  
6 hospitalization for COVID-19 were associated with increased antibody responses across the  
7 serological assays[24]. In our study most of the subjects that were hospitalized were males and they  
8 had a median age that was higher than in Symptomatic participants or Oligo/asymptomatic  
9 participants. However, we are unsure whether other factors such as time of diagnosis, sampling  
10 efficiency using swab samples, and early treatment – such as steroids[25] – might have influenced  
11 the intensity of antibody responses[23].  
12  
13  
14  
15  
16  
17  
18  
19  
20  
21  
22  
23

24 We found also that in most of the participants that exhibited anti-S at the initial screening the  
25 antibody titers persisted for 12 months with decrease of the anti-S below threshold in less than 10%  
26 that were mostly asymptomatic participants. Despite initial reports that persistence of antibody  
27 against SARS-Cov-2 was limited to a few months[26] and that recovered individuals are prone to  
28 reinfection [27], subsequent studies reported that antibodies against SARS-CoV-2 persist over time.  
29 In a population-based study performed in Iceland, 15% of the country's population (around 30,000  
30 individuals) was tested for infection with SARS-CoV-2 by quantitative PCR and antibody testing.  
31 Importantly, anti-N and anti-S antibodies remained stable over the 4 months after diagnosis[28]. In  
32 another cohort of more than 30,000 infected individuals with mild to moderate COVID-19  
33 symptoms, Wajnberg *et al.* assessed the robustness and longevity of the anti-SARS-CoV-2  
34 antibody response. After demonstrating that anti-spike binding titers significantly correlate with  
35 neutralization of authentic SARS-CoV-2, the authors showed that antibody titers remain relatively  
36 stable for at least a period of about 5 months[29]. More recently, Zhenyu He and colleagues [30]  
37 report their cross-sectional study of serological responses of more than 9500 individuals from 3600  
38 households in Wuhan, the first epicenter of the Covid-19 disease. In this study neutralizing  
39 antibodies developed in approximately 40% of antibody-positive individuals. In this subgroup the  
40 proportion of participants who were positive for IgG and neutralizing antibodies, and the titers of  
41  
42  
43  
44  
45  
46  
47  
48  
49  
50  
51  
52  
53  
54  
55  
56  
57  
58  
59  
60

1  
2  
3 neutralizing antibodies, did not significantly decrease during the 9 months of observation. Similarly,  
4  
5 Favresse *et al*, found stable antibody titers over a period of 10 months with the highest positivity  
6  
7 rates in patients with clinically significant past SARS-CoV-2 infection[31].  
8  
9

10 These results are in agreement with ours that showed anti-Spike antibodies persisted for at least one  
11  
12 year in the subjects that showed infection between February and March 2020 and resulted  
13  
14 serologically positive. In addition to this important finding, our results showed also that 32% of  
15  
16 participants serologically positive at the initial visit, reported a significant increase in the antibody  
17  
18 titers during follow-up and this increase occurred during subsequent pandemic infections.  
19  
20 Importantly, none of these participants reported reinfection indicating that these antibodies have a  
21  
22 protective effect on Sars-Cov-2 infection. In general, participants that exhibited increase in antibody  
23  
24 titers were working on public (e.g., pharmacists, nurses, medical doctors, bus drivers etc.) and were  
25  
26 more likely to be re-infected. We are aware of a participant who despite his family members  
27  
28 developed Sars-Cov-2 infection during the second pandemic, he/she resulted negative on swab,  
29  
30 never reported any clinical symptom of infection but had his/her anti-Spike titer increasing 4 times  
31  
32 indicating a protective effect. A growing number of studies are showing that natural infection does  
33  
34 protect against SARS-CoV-2 reinfection and/or symptomatic disease[32-35]. A recent study by Hall  
35  
36 et al, analyzed data from 8278 individuals with known previous SARS-CoV-2 infection and  
37  
38 positive for antibody at enrolment and 17 383 individuals who were seronegative and without past-  
39  
40 infection with SARS-CoV-2 and found that previous SARS-CoV-2 infection provided a 84% risk  
41  
42 reduction for reinfection and 93% risk reduction for those with symptomatic infections despite the  
43  
44 concern of the circulation of variant of concern known as B.1.1.7[36].  
45  
46  
47  
48  
49  
50  
51

## 52 **Strength and limitation**

53

54 Strength of our study include follow-up that lasted for at least one year across from the first  
55  
56 pandemic from, the use of both types of serological assays for the understanding of antibody  
57  
58 characteristics.  
59  
60

1  
2  
3 We acknowledge some limitations of our study. First, our study does not have a baseline serologic  
4 testing since it was conceived in late April and it was not possible to obtain serologic testing when  
5  
6 participants had the disease. The time from disease onset and the first clinical and serologic testing  
7  
8 was 3 to 6 months. We believe that this could not have biased our results, however, we are unsure  
9  
10 whether those that resulted negative at the first visit – who predominately were oligo/asymptomatic  
11  
12 participants – could have positive result on the first visit. Second, the study lacks clinical and  
13  
14 serological information regarding those who died during the pandemic event, hence we are unable  
15  
16 to conclude whether quantitative serologic testing could predict survival.  
17  
18  
19  
20  
21

## 22 Conclusion

23  
24 Beside determining the diagnosis of current and past infection, one of the major role of serological  
25 testing is to determine the immunization status with which it is possible to predict immunity from  
26  
27 future infection. The use of SARS-CoV-2 serological tests requires understanding of how these tests  
28  
29 perform in populations over time. Immunologic response from Sars-Cov-2 infection is characterized  
30  
31 by both anti N and anti-S antibodies. While anti-N antibodies can be useful for diagnosis of past  
32  
33 disease they do not persist overtime and may have any role in the protection from a reinfection.  
34  
35 Given its qualitative characteristic it might not have an important role in the assessment of  
36  
37 seroprevalence. Anti-S antibody titers correlates well with disease severity, persist for at least one  
38  
39 year and most probably provide protection from reinfection.  
40  
41  
42  
43  
44  
45

46 **Contributors** IA and MM conceived the original idea of the study. IA, AG, EP, SP, RA, SA, AF,  
47 EM, LA, PM, MLO, MR, MB, EB, and MM: participated in the data analysis and interpretation,  
48 drafted and critically revised the final version of the manuscript. IA, AG, EP, SP, RA, LA, PM,  
49 MR, MB, EB, and MM: supervised the laboratory analysis. IA, AG, EP, SP, RA, LA, PM, MR,  
50 MB, EB, and MM: participated in the data collection. MM is the guarantor.  
51  
52

53 **Funding** This research received no specific grant from any funding agency in the public,  
54 commercial or not-for-profit sectors.  
55

56 **Competing interests:** None declared.  
57

58 **Data availability:** No additional data available  
59  
60

1  
2  
3  
4  
5  
6  
7  
8  
9  
10  
11  
12  
13  
14  
15  
16  
17  
18  
19  
20  
21  
22  
23  
24  
25  
26  
27  
28  
29  
30  
31  
32  
33  
34  
35  
36  
37  
38  
39  
40  
41  
42  
43  
44  
45  
46  
47  
48  
49  
50  
51  
52  
53  
54  
55  
56  
57  
58  
59  
60

**Collaborators** Alessandra De Masi, Manuela Costantini, Anna Chiara Lombardo, Anna Rita Vecchiarelli, Miria Flaviani, Carla Merigiola

## Figure legends

**Figure 1.** Study screening process

**Figure 2.** Duration of signs and symptoms across the three groups of participants

**Figure 3.** Ab-anti-S titer across the three Groups of participants compared across the three periods of follow-up

For peer review only

## Reference

1. Domenico, M., et al., Research Square, 2021.
2. Oran, D.P. and E.J. Topol, *Prevalence of Asymptomatic SARS-CoV-2 Infection*. Annals of Internal Medicine, 2020. **173**(5): p. 362-367.
3. Mizumoto, K., et al., *Estimating the asymptomatic proportion of coronavirus disease 2019 (COVID-19) cases on board the Diamond Princess cruise ship, Yokohama, Japan, 2020*. Eurosurveillance, 2020. **25**(10): p. 2000180.
4. Woloshin, S., N. Patel, and A.S. Kesselheim, *False Negative Tests for SARS-CoV-2 Infection - Challenges and Implications*. N Engl J Med, 2020. **383**(6): p. e38.
5. Sullivan, P.S., et al., *Detection of SARS-CoV-2 RNA and Antibodies in Diverse Samples: Protocol to Validate the Sufficiency of Provider-Observed, Home-Collected Blood, Saliva, and Oropharyngeal Samples*. JMIR Public Health Surveill, 2020. **6**(2): p. e19054.
6. Kopel, J., H. Goyal, and A. Perisetti, *Antibody tests for COVID-19*. Proceedings (Baylor University Medical Center), 2020. **34**(1): p. 63-72.
7. Kohler, P.P., et al., *Prevalence of SARS-CoV-2 antibodies among Swiss hospital workers: Results of a prospective cohort study*. Infect Control Hosp Epidemiol, 2020: p. 1-5.
8. Sethuraman, N., S.S. Jeremiah, and A. Ryo, *Interpreting Diagnostic Tests for SARS-CoV-2*. JAMA, 2020. **323**(22): p. 2249-2251.
9. Valenti, L., et al., *SARS-CoV-2 seroprevalence trends in healthy blood donors during the COVID-19 outbreak in Milan*. Blood transfusion = Trasfusione del sangue, 2021. **19**(3): p. 181-189.
10. Peiris, J.S.M., et al., *Clinical progression and viral load in a community outbreak of coronavirus-associated SARS pneumonia: a prospective study*. Lancet (London, England), 2003. **361**(9371): p. 1767-1772.
11. Yan, Y., L. Chang, and L. Wang, *Laboratory testing of SARS-CoV, MERS-CoV, and SARS-CoV-2 (2019-nCoV): Current status, challenges, and countermeasures*. Rev Med Virol, 2020. **30**(3): p. e2106.
12. WHO, *Severe Acute Respiratory Syndrome (SARS): laboratory diagnostic tests*. 2020.
13. Qiu, M., et al., *Antibody responses to individual proteins of SARS coronavirus and their neutralization activities*. Microbes Infect, 2005. **7**(5-6): p. 882-9.
14. Deeks, J.J., et al., *Antibody tests for identification of current and past infection with SARS-CoV-2*. Cochrane Database of Systematic Reviews, 2020(6).
15. To, K.K.-W., et al., *Temporal profiles of viral load in posterior oropharyngeal saliva samples and serum antibody responses during infection by SARS-CoV-2: an observational cohort study*. The Lancet. Infectious diseases, 2020: p. S1473-3099(20)30196-1.
16. Diagnostics, A., *SARS-CoV-2 IgG For Use With ARCHITECT*. 2020.
17. Chew, K.L., et al., *Clinical evaluation of serological IgG antibody response on the Abbott Architect for established SARS-CoV-2 infection*. Clin Microbiol Infect, 2020. **26**(9): p. 1256.e9-1256.e11.
18. Bryan, A., et al., *Performance Characteristics of the Abbott Architect SARS-CoV-2 IgG Assay and Seroprevalence in Boise, Idaho*. Journal of clinical microbiology, 2020. **58**(8): p. e00941-20.
19. S.p.A., D., *LIAISON®SARS-CoV-2 S1/S2 IgG package insert 2020-04*. 2020.
20. Cervia, C., et al., *Systemic and mucosal antibody responses specific to SARS-CoV-2 during mild versus severe COVID-19*. J Allergy Clin Immunol, 2021. **147**(2): p. 545-557.e9.
21. Dogan, M., et al., *SARS-CoV-2 specific antibody and neutralization assays reveal the wide range of the humoral immune response to virus*. Communications Biology, 2021. **4**(1): p. 129.
22. Rijkers, G., et al., *Differences in Antibody Kinetics and Functionality Between Severe and Mild Severe Acute Respiratory Syndrome Coronavirus 2 Infections*. J Infect Dis, 2020. **222**(8): p. 1265-1269.
23. Garcia-Beltran, W.F., et al., *COVID-19-neutralizing antibodies predict disease severity and survival*. Cell, 2021. **184**(2): p. 476-488.e11.
24. Klein, S.L., et al., *Sex, age, and hospitalization drive antibody responses in a COVID-19 convalescent plasma donor population*. The Journal of Clinical Investigation, 2020. **130**(11): p. 6141-6150.
25. Siemieniuk, R.A., et al., *Drug treatments for covid-19: living systematic review and network meta-analysis*. Bmj, 2020. **370**: p. m2980.



1  
2  
3  
4  
5  
6  
7  
8  
9  
10  
11  
12  
13  
14  
15  
16  
17  
18  
19  
20  
21  
22  
23  
24  
25  
26  
27  
28  
29  
30  
31  
32  
33  
34  
35  
36  
37  
38  
39  
40  
41  
42  
43  
44  
45  
46  
47  
48  
49  
50  
51  
52  
53  
54  
55  
56  
57  
58  
59  
60

26. Seow, J., et al., *Longitudinal observation and decline of neutralizing antibody responses in the three months following SARS-CoV-2 infection in humans*. Nat Microbiol, 2020. **5**(12): p. 1598-1607.
27. Long, Q.X., et al., *Clinical and immunological assessment of asymptomatic SARS-CoV-2 infections*. Nat Med, 2020. **26**(8): p. 1200-1204.
28. Gudbjartsson, D.F., et al., *Humoral Immune Response to SARS-CoV-2 in Iceland*. N Engl J Med, 2020. **383**(18): p. 1724-1734.
29. Wajnberg, A., et al., *Robust neutralizing antibodies to SARS-CoV-2 infection persist for months*. Science (New York, N.Y.), 2020. **370**(6521): p. 1227-1230.
30. He, Z., et al., *Seroprevalence and humoral immune durability of anti-SARS-CoV-2 antibodies in Wuhan, China: a longitudinal, population-level, cross-sectional study*. The Lancet, 2021. **397**(10279): p. 1075-1084.
31. Favresse, J., et al., *Persistence of anti-sars-cov-2 antibodies depends on the analytical kit: A report for up to 10 months after infection*. Microorganisms, 2021. **9**(3): p. 1-13.
32. Hansen, C.H., et al., *Assessment of protection against reinfection with SARS-CoV-2 among 4 million PCR-tested individuals in Denmark in 2020: a population-level observational study*. Lancet, 2021. **397**(10280): p. 1204-1212.
33. Lumley, S.F., et al., *Antibody Status and Incidence of SARS-CoV-2 Infection in Health Care Workers*. N Engl J Med, 2021. **384**(6): p. 533-540.
34. Pilz, S., et al., *SARS-CoV-2 re-infection risk in Austria*. Eur J Clin Invest, 2021. **51**(4): p. e13520.
35. Sheehan, M.M., A.J. Reddy, and M.B. Rothberg, *Reinfection Rates among Patients who Previously Tested Positive for COVID-19: a Retrospective Cohort Study*. Clin Infect Dis, 2021.
36. Krammer, F., *Correlates of protection from SARS-CoV-2 infection*. Lancet (London, England), 2021. **397**(10283): p. 1421-1423.

1  
2  
3  
4  
5  
6  
7  
8  
9  
10  
11  
12  
13  
14  
15  
16  
17  
18  
19  
20  
21  
22  
23  
24  
25  
26  
27  
28  
29  
30  
31  
32  
33  
34  
35  
36  
37  
38  
39  
40  
41  
42  
43  
44  
45  
46  
47  
48  
49  
50  
51  
52  
53  
54  
55  
56  
57  
58  
59  
60

For peer review only

1  
2  
3  
4  
5  
6  
7  
8  
9  
10  
11  
12  
13  
14  
15  
16  
17  
18  
19  
20  
21  
22  
23  
24  
25  
26  
27  
28  
29  
30  
31  
32  
33  
34  
35  
36  
37  
38  
39  
40  
41  
42  
43  
44  
45  
46

For peer review only

1  
2  
3  
4  
5  
6  
7  
8  
9  
10  
11  
12  
13  
14  
15  
16  
17  
18  
19  
20  
21  
22  
23  
24  
25  
26  
27  
28  
29  
30  
31  
32  
33  
34  
35  
36  
37  
38  
39  
40  
41  
42  
43  
44  
45  
46

For peer review only

**Figure 1.** Study screening process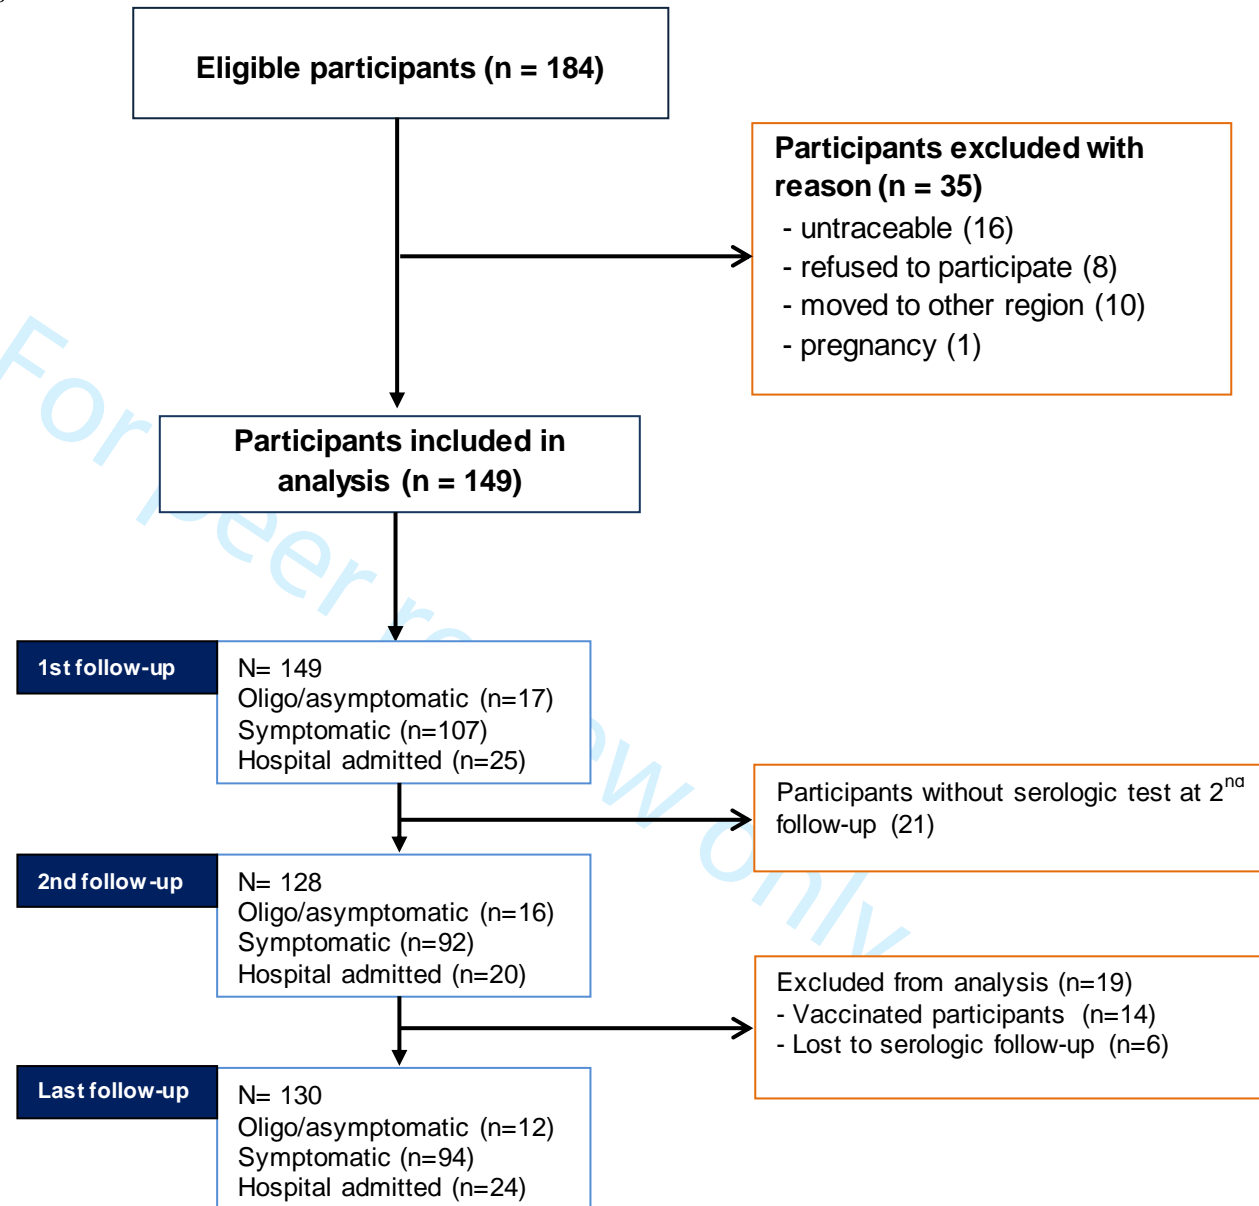

Figure 2. Duration of signs and symptoms across the three groups of participants

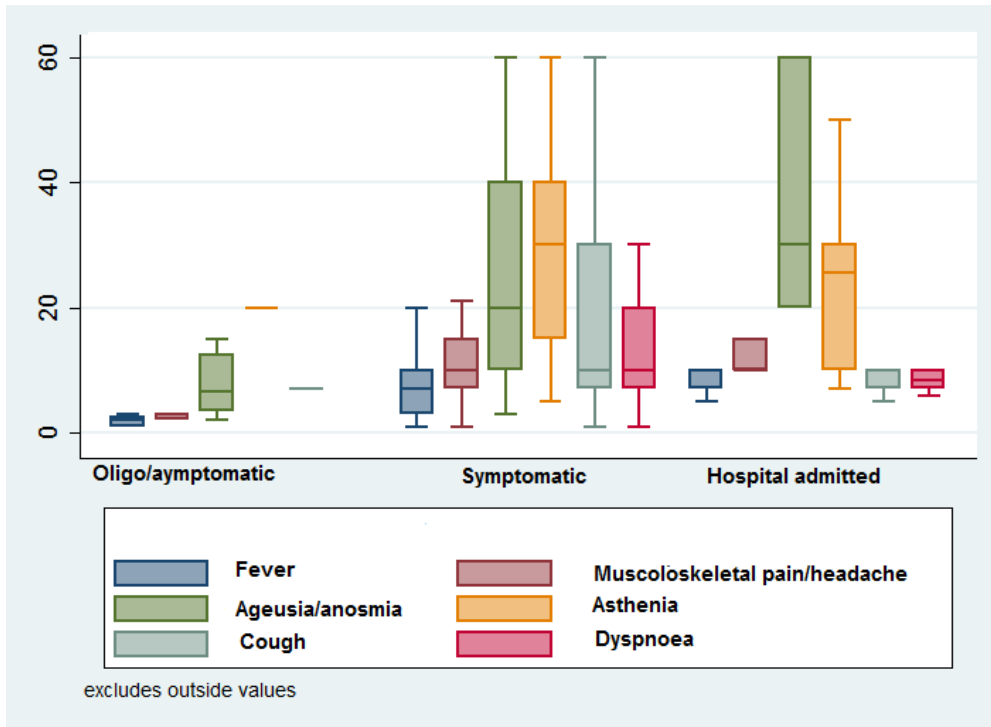

1  
2  
3  
4  
5  
6  
7  
8  
9  
10  
11  
12  
13  
14  
15  
16  
17  
18  
19  
20  
21  
22  
23  
24  
25  
26  
27  
28  
29  
30  
31  
32  
33  
34  
35  
36  
37  
38  
39  
40  
41  
42  
43  
44  
45  
46  
47  
48  
49  
50  
51  
52  
53  
54  
55  
56  
57  
58  
59  
60

**Figure 3. Ab-anti-S titer across the three Groups of participants compared across the three periods of follow-up**

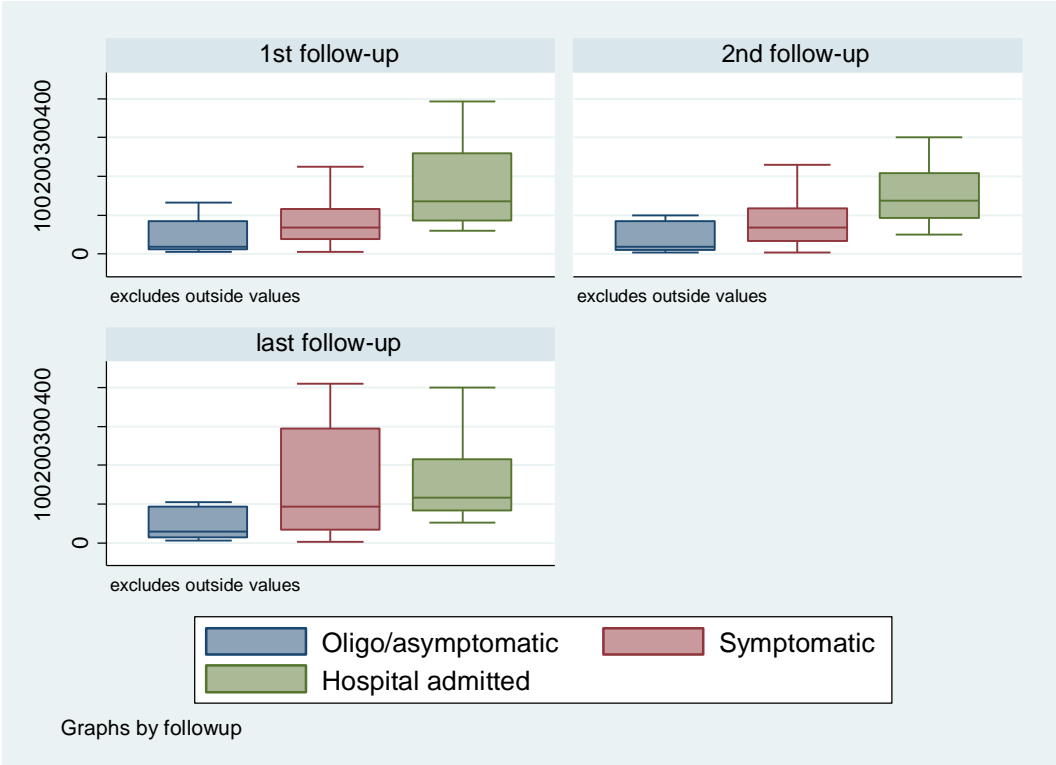

review only

STROBE Statement—Checklist of items that should be included in reports of *cross-sectional studies*

|                              | Item No | Recommendation                                                                                                                                                                                    | Page No                                  |
|------------------------------|---------|---------------------------------------------------------------------------------------------------------------------------------------------------------------------------------------------------|------------------------------------------|
| <b>Title and abstract</b>    | 1       | (a) Indicate the study's design with a commonly used term in the title or the abstract                                                                                                            | 1                                        |
|                              |         | (b) Provide in the abstract an informative and balanced summary of what was done and what was found                                                                                               | 1, 2                                     |
| <b>Introduction</b>          |         |                                                                                                                                                                                                   |                                          |
| Background/rationale         | 2       | Explain the scientific background and rationale for the investigation being reported                                                                                                              | 3, 4                                     |
| Objectives                   | 3       | State specific objectives, including any prespecified hypotheses                                                                                                                                  | 4, 5                                     |
| <b>Methods</b>               |         |                                                                                                                                                                                                   |                                          |
| Study design                 | 4       | Present key elements of study design early in the paper                                                                                                                                           | 6                                        |
| Setting                      | 5       | Describe the setting, locations, and relevant dates, including periods of recruitment, exposure, follow-up, and data collection                                                                   | 6                                        |
| Participants                 | 6       | (a) Give the eligibility criteria, and the sources and methods of selection of participants                                                                                                       | 6                                        |
| Variables                    | 7       | Clearly define all outcomes, exposures, predictors, potential confounders, and effect modifiers. Give diagnostic criteria, if applicable                                                          | 6                                        |
| Data sources/<br>measurement | 8*      | For each variable of interest, give sources of data and details of methods of assessment (measurement). Describe comparability of assessment methods if there is more than one group              | 6, 7                                     |
| Bias                         | 9       | Describe any efforts to address potential sources of bias                                                                                                                                         | 7                                        |
| Study size                   | 10      | Explain how the study size was arrived at                                                                                                                                                         | all available participants were included |
| Quantitative variables       | 11      | Explain how quantitative variables were handled in the analyses. If applicable, describe which groupings were chosen and why                                                                      | 7                                        |
| Statistical methods          | 12      | (a) Describe all statistical methods, including those used to control for confounding                                                                                                             | 7                                        |
|                              |         | (b) Describe any methods used to examine subgroups and interactions                                                                                                                               | 7                                        |
|                              |         | (c) Explain how missing data were addressed                                                                                                                                                       | 7                                        |
|                              |         | (d) If applicable, describe analytical methods taking account of sampling strategy                                                                                                                | 7                                        |
|                              |         | (e) Describe any sensitivity analyses                                                                                                                                                             | 7                                        |
| <b>Results</b>               |         |                                                                                                                                                                                                   |                                          |
| Participants                 | 13*     | (a) Report numbers of individuals at each stage of study—eg numbers potentially eligible, examined for eligibility, confirmed eligible, included in the study, completing follow-up, and analysed | 8                                        |
|                              |         | (b) Give reasons for non-participation at each stage                                                                                                                                              | 8                                        |
|                              |         | (c) Consider use of a flow diagram                                                                                                                                                                | 8                                        |
| Descriptive data             | 14*     | (a) Give characteristics of study participants (eg demographic, clinical, social) and information on exposures and potential confounders                                                          | 8, 9                                     |



|                          |     |                                                                                                                                                                                                              |        |
|--------------------------|-----|--------------------------------------------------------------------------------------------------------------------------------------------------------------------------------------------------------------|--------|
|                          |     | (b) Indicate number of participants with missing data for each variable of interest                                                                                                                          | 8, 9   |
| Outcome data             | 15* | Report numbers of outcome events or summary measures                                                                                                                                                         | 8 - 14 |
| Main results             | 16  | (a) Give unadjusted estimates and, if applicable, confounder-adjusted estimates and their precision (eg, 95% confidence interval). Make clear which confounders were adjusted for and why they were included | 8 - 14 |
|                          |     | (b) Report category boundaries when continuous variables were categorized                                                                                                                                    | 8 - 14 |
|                          |     | (c) If relevant, consider translating estimates of relative risk into absolute risk for a meaningful time period                                                                                             | na     |
| Other analyses           | 17  | Report other analyses done—eg analyses of subgroups and interactions, and sensitivity analyses                                                                                                               | 10-14  |
| <b>Discussion</b>        |     |                                                                                                                                                                                                              |        |
| Key results              | 18  | Summarise key results with reference to study objectives                                                                                                                                                     | 15     |
| Limitations              | 19  | Discuss limitations of the study, taking into account sources of potential bias or imprecision. Discuss both direction and magnitude of any potential bias                                                   | 17-18  |
| Interpretation           | 20  | Give a cautious overall interpretation of results considering objectives, limitations, multiplicity of analyses, results from similar studies, and other relevant evidence                                   | 15-18  |
| Generalisability         | 21  | Discuss the generalisability (external validity) of the study results                                                                                                                                        | 16-17  |
| <b>Other information</b> |     |                                                                                                                                                                                                              |        |
| Funding                  | 22  | Give the source of funding and the role of the funders for the present study and, if applicable, for the original study on which the present article is based                                                | 18     |

\*Give information separately for exposed and unexposed groups.

**Note:** An Explanation and Elaboration article discusses each checklist item and gives methodological background and published examples of transparent reporting. The STROBE checklist is best used in conjunction with this article (freely available on the Web sites of PLoS Medicine at <http://www.plosmedicine.org/>, Annals of Internal Medicine at <http://www.annals.org/>, and Epidemiology at <http://www.epidem.com/>). Information on the STROBE Initiative is available at [www.strobe-statement.org](http://www.strobe-statement.org).

# BMJ Open

## Temporal trends and differences of SARS-CoV-2-specific antibody responses in symptomatic and asymptomatic subjects. A longitudinal study from Umbria in Italy

|                                 |                                                                                                                                                                                                                                                                                                                                                                                                                                                                                                                                                                                                                                                                                                                                                                                                                                                                                                                                                                                                                                                                                                                                                                                                                                                                                                                                                                                                                                                                                                                                                                      |
|---------------------------------|----------------------------------------------------------------------------------------------------------------------------------------------------------------------------------------------------------------------------------------------------------------------------------------------------------------------------------------------------------------------------------------------------------------------------------------------------------------------------------------------------------------------------------------------------------------------------------------------------------------------------------------------------------------------------------------------------------------------------------------------------------------------------------------------------------------------------------------------------------------------------------------------------------------------------------------------------------------------------------------------------------------------------------------------------------------------------------------------------------------------------------------------------------------------------------------------------------------------------------------------------------------------------------------------------------------------------------------------------------------------------------------------------------------------------------------------------------------------------------------------------------------------------------------------------------------------|
| Journal:                        | <i>BMJ Open</i>                                                                                                                                                                                                                                                                                                                                                                                                                                                                                                                                                                                                                                                                                                                                                                                                                                                                                                                                                                                                                                                                                                                                                                                                                                                                                                                                                                                                                                                                                                                                                      |
| Manuscript ID                   | bmjopen-2021-056370.R1                                                                                                                                                                                                                                                                                                                                                                                                                                                                                                                                                                                                                                                                                                                                                                                                                                                                                                                                                                                                                                                                                                                                                                                                                                                                                                                                                                                                                                                                                                                                               |
| Article Type:                   | Original research                                                                                                                                                                                                                                                                                                                                                                                                                                                                                                                                                                                                                                                                                                                                                                                                                                                                                                                                                                                                                                                                                                                                                                                                                                                                                                                                                                                                                                                                                                                                                    |
| Date Submitted by the Author:   | 01-Mar-2022                                                                                                                                                                                                                                                                                                                                                                                                                                                                                                                                                                                                                                                                                                                                                                                                                                                                                                                                                                                                                                                                                                                                                                                                                                                                                                                                                                                                                                                                                                                                                          |
| Complete List of Authors:       | <p>Abraha, Iosief; Azienda Unità Sanitaria Locale Umbria 2, Servizio Immunotrasfusionale</p> <p>Eusebi, Paolo; University of Perugia, Department of Medicine</p> <p>Germani, Antonella; Azienda Unità Sanitaria Locale Umbria 2, Servizio Immunotrasfusionale</p> <p>Pasquarelli, Erica; Azienda Unità Sanitaria Locale Umbria 2, Servizio Immunotrasfusionale</p> <p>Pascolini, Sofia; Azienda Unità Sanitaria Locale Umbria 2, Servizio Immunotrasfusionale</p> <p>Antonietti, Rossana; Azienda Unità Sanitaria Locale Umbria 2, Servizio Immunotrasfusionale</p> <p>Argenti, Sandro; Azienda Unità Sanitaria Locale Umbria 2, Servizio Immunotrasfusionale</p> <p>Fioravanti, Alessandra; Azienda Unità Sanitaria Locale Umbria 2, Servizio Immunotrasfusionale</p> <p>Martini, Elisa; Azienda Unità Sanitaria Locale Umbria 2, Servizio Immunotrasfusionale</p> <p>Aristei, Luana; Azienda Unità Sanitaria Locale Umbria 2, Servizio Immunotrasfusionale</p> <p>Mancinelli, Paola; Azienda Unità Sanitaria Locale Umbria 2, Servizio Immunotrasfusionale</p> <p>Ottaviani, Maria Letizia; Azienda Unità Sanitaria Locale Umbria 2, Servizio Immunotrasfusionale</p> <p>Roselli, Martina; Azienda Unità Sanitaria Locale Umbria 2, Servizio Immunotrasfusionale</p> <p>Barzacca, Milena; Azienda Unità Sanitaria Locale Umbria 2, Servizio Immunotrasfusionale</p> <p>Belardinelli, Erika; Azienda Unità Sanitaria Locale Umbria 2, Servizio Immunotrasfusionale</p> <p>Micheli, Marta; Azienda Unità Sanitaria Locale Umbria 2, Servizio Immunotrasfusionale</p> |
| <b>Primary Subject Heading</b>: | Infectious diseases                                                                                                                                                                                                                                                                                                                                                                                                                                                                                                                                                                                                                                                                                                                                                                                                                                                                                                                                                                                                                                                                                                                                                                                                                                                                                                                                                                                                                                                                                                                                                  |
| Secondary Subject Heading:      | Immunology (including allergy)                                                                                                                                                                                                                                                                                                                                                                                                                                                                                                                                                                                                                                                                                                                                                                                                                                                                                                                                                                                                                                                                                                                                                                                                                                                                                                                                                                                                                                                                                                                                       |
| Keywords:                       | INFECTIOUS DISEASES, COVID-19, VIROLOGY, IMMUNOLOGY                                                                                                                                                                                                                                                                                                                                                                                                                                                                                                                                                                                                                                                                                                                                                                                                                                                                                                                                                                                                                                                                                                                                                                                                                                                                                                                                                                                                                                                                                                                  |

1  
2  
3  
4  
5  
6  
7  
8  
9  
10  
11  
12  
13  
14  
15  
16  
17  
18  
19  
20  
21  
22  
23  
24  
25  
26  
27  
28  
29  
30  
31  
32  
33  
34  
35  
36  
37  
38  
39  
40  
41  
42  
43  
44  
45  
46  
47  
48  
49  
50  
51  
52  
53  
54  
55  
56  
57  
58  
59  
60

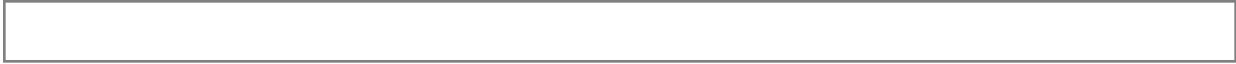

SCHOLARONE™  
Manuscripts



I, the Submitting Author has the right to grant and does grant on behalf of all authors of the Work (as defined in the below author licence), an exclusive licence and/or a non-exclusive licence for contributions from authors who are: i) UK Crown employees; ii) where BMJ has agreed a CC-BY licence shall apply, and/or iii) in accordance with the terms applicable for US Federal Government officers or employees acting as part of their official duties; on a worldwide, perpetual, irrevocable, royalty-free basis to BMJ Publishing Group Ltd ("BMJ") its licensees and where the relevant Journal is co-owned by BMJ to the co-owners of the Journal, to publish the Work in this journal and any other BMJ products and to exploit all rights, as set out in our [licence](#).

The Submitting Author accepts and understands that any supply made under these terms is made by BMJ to the Submitting Author unless you are acting as an employee on behalf of your employer or a postgraduate student of an affiliated institution which is paying any applicable article publishing charge ("APC") for Open Access articles. Where the Submitting Author wishes to make the Work available on an Open Access basis (and intends to pay the relevant APC), the terms of reuse of such Open Access shall be governed by a Creative Commons licence – details of these licences and which [Creative Commons](#) licence will apply to this Work are set out in our licence referred to above.

Other than as permitted in any relevant BMJ Author's Self Archiving Policies, I confirm this Work has not been accepted for publication elsewhere, is not being considered for publication elsewhere and does not duplicate material already published. I confirm all authors consent to publication of this Work and authorise the granting of this licence.

# Temporal trends and differences of SARS-CoV-2-specific antibody responses in symptomatic and asymptomatic subjects. A longitudinal study from Umbria in Italy

Iosief Abraha<sup>1</sup>, Paolo Eusebi<sup>2</sup>, Antonella Germani<sup>1</sup>, Erica Pasquarelli<sup>1</sup>, Sofia Pascolini<sup>1</sup>, Rossana Antonietti<sup>1</sup>, Sandro Argenti<sup>1</sup>, Alessandra Fioravanti<sup>1</sup>, Elisa Martini<sup>1</sup>, Luana Aristei<sup>1</sup>, Paola Mancinelli<sup>1</sup>, Maria Letizia Ottaviani<sup>1</sup>, Martina Roselli<sup>1</sup>, Milena Barzacca<sup>1</sup>, Erika Belardinelli<sup>1</sup>, Marta Micheli<sup>1</sup>

Correspondence to: Dr. Iosief Abraha; [iosief\\_a@yahoo.it](mailto:iosief_a@yahoo.it)

1 Servizio Immunotrasfusionale

Azienda USL Umbria 2

Foligno – Italy

2 Department of Medicine and Surgery

University of Perugia

Perugia – Italy

## Abstract

**Objectives** Dynamics of antibody responses following SARS-CoV-2 infection are controversial in terms of immunity and persistence. We aimed to assess longitudinally the trend of antibody serological titers, their correlation with clinical severity as well as clinical reinfection during follow-up.

**Design** Longitudinal cohort, 12 months follow-up study.

**Setting** USL Umbria 2.

**Participants** Consecutive subjects aged 15 to 75 who were discharged with the diagnosis of Sars-Cov-2 from the hospitals of the AUSL Umbria 2, or resulted positive to a PCR test for Sars-Cov-2 infection with or without symptoms were recruited. SARS-CoV-2 serologic testing for antibodies targeting the Nucleocapside and Spike proteins were determined.

**Results** Of 184 eligible subjects, 149 were available for evaluation: 17 were classified as Oligo/asymptomatic, 107 as Symptomatic, 25 as Hospital admitted. Participants differed in terms of signs and symptoms as well as treatment.

Overall there was a significant difference in terms of antibody titers between groups (Anti-S:  $P < 0.00$ ; Anti-N:  $P = 0.019$ ).

Median anti-S titers in the symptomatic and hospital admitted participants were significantly higher compared to the oligo/asymptomatic participants. During follow-up the median titer of anti-S antibodies did not show significant variations ( $p = 0.500$ ) and the difference within groups remained constant overtime. Subjects that showed an anti-S titer above the threshold of 12 U/ml were 88.7% at first visit and 88.2% at last follow-up.

Anti-N values were higher in the hospital admitted participants compared to the other two groups.

Anti-N titer reduced constantly overtime ( $P < 0.001$ ) and across the three groups of participants.

The percentage of the subjects with serologic titer above threshold ( $< 1.4$  U/ml) decreased from 74.5% to 29.2% ( $p < 0.001$ ).

None of the participants developed clinically evident reinfection.

**Conclusion** – Anti-N and Anti-S correlates well with clinical severity. While anti-N decline overtime, Anti-S antibodies persist for at least one year.

#### Strengths and limitations of this study

- The key strength of this study is the evaluation of anti-Sars-Cov-2 serology using two types of serological assays and the follow-up that endured for at least 12 months
- In addition to serological evaluation participants were also followed-up clinically
- The study does not have a baseline serologic testing since it was conceived in late April 2020 when most of the participants were discharged from hospital or had their symptoms resolved
- The study lacks clinical and serological information regarding those who died during the pandemic event, hence we are unable to conclude whether quantitative serologic testing could predict survival

## Background

COVID-19 infection is associated with severe morbidity and mortality, and it presents important challenges in different settings including prevention, treatment as well as diagnostic and prognostic significance based on immune response. The diagnosis of COVID-19 disease depends much on clinical or epidemiological context though it is mainly based on the molecular testing of symptomatic subjects. Since false-negative nasopharyngeal RT-PCR tests results are not infrequent[1-4], the antibody tests allow for better collection of epidemiological data, determination of the immune status of asymptomatic individuals, and screening of previous exposure [5]. Hence, COVID-19 serologic tests, despite their limitation and somewhat challenging performance characteristics, can be an appropriate tool to better diagnose recent or past infection[4].

Serologic tests have been introduced to detect antigens namely the spike protein (S), the protein nucleocapside (N) and the virus membrane[6]. N and S proteins were found to be the major immunogenic proteins [7]. As in the MERS-CoV infection, antibodies against proteins S, 3a, N, and 9b were detected in the sera from convalescent-phase SARS patients [7]. Though anti-S and anti-N were dominant and could persist in the sera of SARS patients until week 30, only anti-S3 demonstrated significant neutralizing activity [7].

Current methods available for serologic testing include rapid diagnostic tests (RDT), enzyme-linked immunosorbent assays (ELISA), neutralization assays, and chemiluminescent immunoassays (CLIA) [6]. ELISA and CLIA are considered suitable for first line screening because of the large throughput, short processing time, and simple operating procedure [8].

A Cochrane review evaluated the diagnostic accuracy of antibody tests – using RT-PCR as reference standard – to determine whether a person presenting in the community or in primary or secondary care has SARS-CoV-2 infection [9]. The authors concluded antibody tests are likely to have a useful role for detecting previous SARS-CoV-2 infection if used 15 (sensitivity 91%; 95% CI 87 to 94) or more days after the onset of symptoms [9].

1  
2  
3 In addition to antibody profile, longitudinal persistence of immunity in convalescent COVID-19  
4 subjects has been another issue of debate for months after the first pandemic. An observational  
5 study published during that pandemic [10] found in 23 patients a positive correlation between  
6 enzyme immunoassay antibodies and neutralizing antibody titer but concluded that further  
7 investigation is needed on the role of anti-COVID antibodies in immunopathology and / or antiviral  
8 treatment [10].  
9

10 We performed a longitudinal cohort study in Umbria of subjects with a confirmed diagnosis of  
11 Sars-Cov-2 between February and April 2020 with a follow-up of at least 12 months. Levels of IgG  
12 antibodies against SARS-CoV-2 Nucleocapside (N), and neutralizing antibodies were determined.  
13 The objectives of our study were (a) to describe differences in clinical and treatment characteristics  
14 between clinical categories of subjects who had Sars-Cov-2 (oligo/asymptomatic, symptomatic and  
15 hospital admitted); (b) to assess the correlation between serological titers and the clinical categories;  
16 (c) to evaluate the trend of anti-Sars-Cov-2 titers among the clinical categories over a follow-up of  
17 12 months. In addition, we performed a clinical and history evaluation of the participants for a  
18 possible viral infection at every time follow-up.  
19  
20  
21  
22  
23  
24  
25  
26  
27  
28  
29  
30  
31  
32  
33  
34  
35  
36  
37  
38  
39  
40  
41  
42  
43  
44  
45  
46  
47  
48  
49  
50  
51  
52  
53  
54  
55  
56  
57  
58  
59  
60



## Methods

### Study design and target population

The present study was prospective longitudinal in design. Our cohort of interest was characterized by consecutive subjects aged 15 to 75 who, from February 2020 to April 2021, (a) were discharged with the diagnosis of Sars-Cov-2 from the hospitals of the AUSL Umbria 2, or (b) resulted positive to a PCR test for Sars-Cov-2 infection. These subjects were invited to undertake serologic SARS-CoV-2 testing for antibodies targeting the Nucleocapside (N) protein and S proteins of SARS-CoV-2. All the cohort was clinically and serologically followed-up longitudinally. After enrollment, serology testing was performed every 3-4 months for every participant until the end of follow-up. Clinical signs and symptoms as well as specific COVID-19 treatments were recorded at baseline. During follow-up, at the time of sample collection, participants were evaluated for potential COVID-19 related clinical reinfection or re-hospitalized upon reinfection. For our analysis participants were categorized as follows: (a) oligo/asymptomatic, (b) symptomatic, and (c) hospital admitted. Oligosymptomatic were those participants with symptoms enduring for less than three days or with only one symptom (anosmia/ageusia or asthenia) that may last for more than three days. Conversely, symptomatic patients were those with more than one symptom lasting at least three days and without any hospital admission.

### Laboratory methods

Serum samples were analyzed using two commercial serologic assays: Abbott SARS-CoV-2 IgG, DiaSorin Liaison SARS-CoV-2 S1/S2 IgG.

The qualitative detection of anti-N IgG was performed using a chemiluminescent microparticle immunoassay (Abbott ARCHITECT SARS-CoV-2 IgG). A signal/cut-off ratio of  $\geq 1.4$  was interpreted as reactive according to the manufacturer's instructions [11]. Studies report that clinical sensitivity is time-dependent and after day-14 it ranges between 84.2–100% whereas specificity results 99.6%-100% [12, 13]. Prior to analyses of patient samples, calibration was performed and

1  
2  
3 negative quality control signal/cut-off ratio  $\leq 0.78$  and positive quality control signal/cut-off ratio  
4  
5 1.65–8.40 were achieved.  
6

7  
8 The quantitative detection of anti-S IgG was evaluated using a standardized automated  
9  
10 chemiluminescent assay (DiaSorin S.p.A., Saluggia, Italy). A detection of  $\geq 12$  AU/ml was  
11  
12 interpreted as positive according to the manufacturer's instructions [14]. The test's sensitivity is  
13  
14 time-dependent, that is 25% in the first 5 days after RT-PCR-confirmed diagnosis, 90% from day 5  
15  
16 to day 15, and 97% from day-15 forward.  
17  
18

## 19 20 **Statistical analysis**

21  
22 Demographic characteristics of the study participants was described by calculating the frequencies  
23  
24 and percentages for categorical variables, and medians and inter-quartile intervals for continuous  
25  
26 variables. The analysis of the normal distribution of the sample was evaluated analytically with the  
27  
28 Kolmogorov - Smirnov test and visually with the Q-Q plots.  
29

30  
31 Trends of anti-Sars-Cov-2 titers among the three groups (i.e., hospital admitted, symptomatic,  
32  
33 oligo/asymptomatic) have been analyzed using a mixed effects model for repeated measurements  
34  
35 (MMRM). Logarithm transformations of the anti-Sars-Cov-2 titers were used as dependent  
36  
37 variables to meet the normality assumption. The model included the group, follow-up and group by  
38  
39 follow-up interaction as fixed effects. The interaction was regardless of significance. Group  
40  
41 comparisons at each follow-up were estimated by differences between least squares (LS) means  
42  
43 from the group by follow-up interaction, with accompanying p-values and 95% Confidence  
44  
45 Intervals (Cis). An unstructured covariance matrix has been used for random effects. We also  
46  
47 modeled the evolution of positivity of serological titers (i.e.  $<12$  U/ml for anti-S titer and  $<1.4$  U/ml  
48  
49 for anti-N titer) with a MMRM with a binomial logit link. In hospitalized subjects, anti-S titer was  
50  
51 above the cutoff, so we weren't able to include these patients in the model. Furthermore, due to the  
52  
53 few negative patients, we fitted only models with titer positivity depending on clinical  
54  
55 characteristics or follow-up. For anti-N titer positivity, we were able to fit a full model with the  
56  
57  
58  
59  
60

1  
2  
3 group, follow-up and group by follow-up interaction as fixed effects. The interaction was included  
4  
5 in the model regardless of significance. Due to convergence issues, a Toeplitz covariance matrix has  
6  
7 been used for the random effects. To test the hypothesis of a different rate of decline of anti-Sars-  
8  
9 Cov-2 titers depending of baseline levels, we also performed a MMRM with change from baseline  
10  
11 in the values of anti-Sars-Cov-2 titers as dependent variables. The models included baseline, follow  
12  
13 up and baseline by follow-up interaction.  
14  
15

16  
17 For all the models, parameters have been estimated using REML with the Newton-Raphson  
18  
19 algorithm and Kenward-Roger method for calculating the degrees of freedom. Point estimates and  
20  
21 95% CIs were plotted for the MMRM of log anti-Sars-Cov-2 titers.  
22  
23

24 All other models were fitted using the Proc Mixed and Proc Glimmix procedures from the SAS  
25  
26 software version 9.4 (SAS Institute, Cary, NC, USA).  
27  
28

## 29 **Ethics statement**

30  
31 The planning conduct and reporting was performed in accordance with the Declaration of Helsinki,  
32  
33 as revised in 2013. This study was approved by the *Comitato Etico Regionale – Umbria*. The  
34  
35 approval number is CER 3695/20). Written informed consent was obtained.  
36  
37  
38

## 39 **Patient and Public Involvement**

40  
41 No patient involved  
42  
43  
44  
45  
46  
47  
48  
49  
50  
51  
52  
53  
54  
55  
56  
57  
58  
59  
60

## Results

184 potentially eligible subjects were identified. After excluding 35 subjects with reasons 149 met the inclusion criteria and signed the informed consent. Of this cohort 21 were not available to perform the serologic test at the 2<sup>nd</sup> follow-up but 19 of these returned for the last follow-up. Subsequently, 14 subjects received anti-Covid vaccination and 6 were unavailable for serologic testing and were excluded from analysis. At 12 months follow-up 130 participants were still available for clinical and serologic evaluation. All of the excluded subjects at final follow-up were traceable through telephone contact and were possible to obtain their health status. **Figure 1** shows the study screen process.

### Clinical and treatment difference between oligo/asymptomatic, symptomatic and hospital admitted participants

Of the initial cohort, 17 (11%) were oligo/asymptomatic, 107 (72%) were symptomatic participants (without hospital admission), 25 (17%) were participants who were admitted to hospital. The mean age was 49 years (median 54). While 52% of the cohort were female, men tended to have more severe symptoms reaching 80% of the Hospital admitted participants (**Table 1**).

**Table 1.** Basic characteristic of the cohort classified by symptom severity.

|                                    | Oligo/asymptomatic participants* | Symptomatic participants | Hospital admitted participants |
|------------------------------------|----------------------------------|--------------------------|--------------------------------|
| N (%)                              | 17 (11)                          | 107 (71)                 | 25 (16)                        |
| Male (%)                           | 11 (64)                          | 40 (37)                  | 20 (80)                        |
| Age (median; p25, p75)             | 42 (33 – 57)                     | 53 (39 – 59)             | 56 (54-64)                     |
| <b>Clinical signs and symptoms</b> |                                  |                          |                                |
| Fever                              | 7 (44)                           | 94 (83)                  | 23 (92)                        |
| Headache/musculoskeletal pain      | 3 (19)                           | 58 (51)                  | 11 (44)                        |
| Ageusia/anosmia                    | 7 (43)                           | 59 (52)                  | 3 (12)                         |
| Asthenia                           | 1 (6)                            | 59 (52)                  | 8 (32)                         |
| Cough                              | 0 (0)                            | 43 (38)                  | 23 (92)                        |
| Dyspnea                            | 0 (0)                            | 17 (15)                  | 25 (100)                       |
| Pneumonia                          | 0 (0)                            | 3 (3)                    | 25 (100)                       |

| Treatment           |       |         |          |
|---------------------|-------|---------|----------|
| Antibiotic          | 0 (0) | 28 (25) | 25 (100) |
| Hydroxychloroquine  | 0 (0) | 12 (10) | 25 (75)  |
| Heparin             | 0 (0) | 1 (1)   | 24 (96)  |
| Antiviral           | 0 (0) | 0 (0)   | 8 (32)   |
| Monoclonal antibody | 0 (0) | 0 (0)   | 4 (16)   |
| Steroids            | 0 (0) | 14 (13) | 5 (20)   |
| NSAIDS              | 0 (0) | 7 (6)   | 0 (21)   |
| Paracetamol         | 1 (6) | 20 (18) | 1 (4)    |

(\*) Oligo-symptomatic patients are those with symptoms enduring for less than three days or with only one symptom (anosmia/ageusia or asthenia)

(\*\*) Symptomatic patients are those with one more symptom lasting at least three days and without any hospital admission

### Type and duration of symptoms

The most common symptom was fever which resulted common to all the three groups. Headache or musculoskeletal pain was common to symptomatic participants whereas cough and dyspnea was present in all of the admitted participants indicating the severity of the disease. All hospital admitted participants had radiographically documented pneumonia (**Table 1**).

The most persistent symptoms were asthenia (median 30 days) as well as anosmia and/or ageusia (median 30 days). Anosmia/ageusia persisted across the three groups and the median symptoms' duration increased as severity of symptoms increased (median: 6 days in Oligo/asymptomatic participants, 20 days in Symptomatic participants, 30 days in Hospital admitted participants). Similarly, median duration for asthenia was 20 days in the Oligo/asymptomatic participants, 30 days in Symptomatic participants, and 25 days in Hospital admitted participants. In 35 patients, anosmia/ageusia lasted for more than 6 months but resolved completely within 10 months. Duration of symptoms across the three groups of participants are depicted in **Figure 2**. Duration of ageusia/anosmia and asthenia resulted higher in females than in males.

### Treatment used

Most of the Oligo/asymptomatic participants were not treated or reported the use of paracetamol or anti-inflammatory agents. Anti-inflammatory agents were most used in Symptomatic participants.

1  
2  
3 Twenty-five percent of Symptomatic participants and 100% of Hospital admitted participants used  
4 antibiotics. Hydroxychloroquine was used by 10% of the Symptomatic participants and by 100% of  
5 Hospital admitted participants. Low-dose heparin was almost exclusively used by hospitalized  
6 participants. Antivirals and monoclonal antibodies were used in the 32% and 16% of the  
7 hospitalized patients, respectively (**Table 1**).

## 15 **Anti-N and anti-S antibodies: trend and correlation with clinical severity**

### 18 **Anti-Spike**

19  
20 The median value of the antibody anti-S (Diasorin) titer at first visit (that is between June and  
21 September 2020) across the whole cohort was 71.7 U/ml (IQR 31.0-112.0). The median anti-S titer  
22 was 81.0 U/ml, (IQR 31.0-112.0) in males and 65.6 U/ml (IQR 30.0-112.0) in females.

23  
24 Anti-S antibody values differed significantly across the three groups of participants ( $p < 0.001$ ). At  
25 first time follow-up, median titers in the symptomatic (+35.0 U/ml,  $p = 0.001$ ) and hospital admitted  
26 participants (+135.1 U/ml,  $p < 0.001$ ) were significantly higher compared to the oligo/asymptomatic  
27 participants; similarly, anti-S titer levels were higher in the Hospital admitted participants compared  
28 to Symptomatic subjects (+100.0 U/ml,  $p < 0.001$ ) indicating that the more significant were the  
29 clinical signs and symptoms the higher was the anti-S antibody response.

30  
31 At subsequent follow-up visits the median titer of anti-S antibodies did not show significant  
32 variations ( $p = 0.500$ ) and the difference within groups remained constant overtime (**Table 2**).

33  
34 **Figure 3** shows estimated values of anti-S antibody titers among groups of participants in each  
35 periods of follow-up.

36  
37 The value of the antibody anti-S titer at first visit did not influence the rate of change at follow-up.  
38 The subjects that showed an anti-S titer above the threshold of 12 U/ml were 88.7% at first follow-  
39 up, 90.4% at the second and 88.2% at the third. Overall there was a significant difference between  
40 clinical groups with symptomatic showing a higher probability of positivity across all follow up  
41  
42  
43  
44  
45  
46  
47  
48  
49  
50  
51  
52  
53  
54  
55  
56  
57  
58  
59  
60

1  
2  
3 visits ( $p=0.031$ ). The difference across follow-up visits were not significant ( $p=0.833$ ). None of the  
4  
5 hospital admitted subjects had their antibody titer below threshold (**Table 3**).  
6  
7

### 8 **Anti-Nucleocapside**

9  
10 The median value of the antibody anti-N titer at first visit across the whole cohort was 3.1 U/ml  
11  
12 (IQR 1.39-5.00) with non-significant higher values in males (3.84 U/ml, IQR 1.89-5.82) than  
13  
14 females (2.50 U/ml, IQR 0.97-4.30). Overall there was a significant difference in terms of antibody  
15  
16 titers between groups ( $p=0.019$ ).  
17  
18

19  
20 Antibody values were higher in the hospital admitted participants compared to symptomatic  
21  
22 participants at follow- up 2 (+1.2 U/ml,  $p=0.010$ ) and follow- up 3 (+0.7 U/ml,  $p=0.008$ ). Antibody  
23  
24 values were higher in the hospital admitted participants compared to the oligo/asymptomatic  
25  
26 participants at follow- up 1 (+0.8 U/ml,  $p=0.038$ ) follow- up 2 (+1.5 U/ml,  $p=0.011$ ) and follow- up  
27  
28 3 (+1.7 U/ml,  $p=0.011$ ). No statistically significant differences were observed between  
29  
30 Oligo/asymptomatic and symptomatic participants. The antibody titer reduced constantly overtime  
31  
32 ( $p < 0.001$ ) (**Table 2**). **Figure 4** shows estimated values of anti-N antibody titers among groups of  
33  
34 participants in each periods of follow-up.  
35  
36  
37

38  
39 The value of the antibody anti-N titer at first visit did not influence the rate of change at follow-up.  
40  
41 Difference in percentage of anti-N titer between the first and second follow-up and between the first  
42  
43 and last follow-up showed a substantial decrease in the serologic titer across the three groups of  
44  
45 participants (**Table 3**). The percentage of the subjects with serologic titer above threshold ( $< 1.4$   
46  
47 U/ml) decreased from 74.5%% to 29.2% ( $p<0.001$ ). The percentage of the subjects with serologic  
48  
49 titer above threshold ( $< 1.4$  U/ml) was significantly higher in hospital admitted compared to  
50  
51 Oligo/asymptomatic participants ( $p=0.031$ ).  
52  
53  
54  
55  
56  
57  
58  
59  
60

**Table 2.** Median (interquartile range) Anti-N and Anti-S titers according to clinical classification of participants

|                                   | Oligo/asymptomatic | Symptomatic   | Hospital admitted | Total         |
|-----------------------------------|--------------------|---------------|-------------------|---------------|
| <b>Anti-Spike serology</b>        |                    |               |                   |               |
| <b>1<sup>st</sup> follow-up</b>   | 14.6               | 69.5          | 232.0             | 71.7          |
| <b>N=149</b>                      | (10.0, 85.0)       | (33.9, 100.0) | (112.0, 256.0)    | (30.0, 112.0) |
| <b>2<sup>nd</sup> follow-up</b>   | 18.1               | 66.0          | 134.5             | 72.9          |
| <b>N=128</b>                      | (10.0, 86.0)       | (28.6, 136.0) | (75.0, 208.0)     | (29.1, 144.0) |
| <b>Last follow-up</b>             | 16.0               | 72.2          | 116.0             | 85.0          |
| <b>N=130</b>                      | (7.2, 92.0)        | (27.4, 242.0) | (82.9, 216.0)     | (29.1, 190.0) |
| <b>Anti-Nucleocapsid serology</b> |                    |               |                   |               |
| <b>1<sup>st</sup> follow-up</b>   | 3.05               | 3.05          | 4.55              | 3.11          |
| <b>N=149</b>                      | (1.19, 4.93)       | (1.19, 4.93)  | (2.89, 6.02)      | (1.39, 5.00)  |
| <b>2<sup>nd</sup> follow-up</b>   | 1.07               | 1.33          | 2.44              | 1.7           |
| <b>N=128</b>                      | (0.36, 4.00)       | (0.56, 2.40)  | (1.75, 4.22)      | (0.62, 2.89)  |
| <b>Last follow-up</b>             | 0.34               | 0.74          | 1.34              | 0.8           |
| <b>N=130</b>                      | (0.15, 0.88)       | (0.31, 1.60)  | (0.77, 2.38)      | (0.33, 1.71)  |

(\*) Oligo-symptomatic patients are those with symptoms enduring for less than three days or with only one symptom (anosmia/ageusia or asthenia)

(\*\*) Symptomatic patients are those with one more symptom lasting at least three days and without any hospital admission

**Table 3.** Persistence of positivity to Anti-N and Anti-S antibodies and according to clinical classification of participant (n/N (%))

|                                   | Oligo/asymptomatic | Symptomatic   | Hospital admitted | Total          |
|-----------------------------------|--------------------|---------------|-------------------|----------------|
| <b>Anti-Spike serology</b>        |                    |               |                   |                |
| <b>1<sup>st</sup> follow-up</b>   | 5/9 (55.6)         | 44/47 (93.6)  | 6/6 (100.0)       | 55/62 (88.7)   |
| <b>N=149</b>                      |                    |               |                   |                |
| <b>2<sup>nd</sup> follow-up</b>   | 8/11 (72.7)        | 59/65 (90.8)  | 18/18 (100.0)     | 85/94 (90.4)   |
| <b>N=128</b>                      |                    |               |                   |                |
| <b>Last follow-up</b>             | 8/11 (72.7)        | 68/78 (87.2)  | 21/21 (100.0)     | 97/110 (88.2)  |
| <b>N=130</b>                      |                    |               |                   |                |
| <b>Anti-Nucleocapsid serology</b> |                    |               |                   |                |
| <b>1<sup>st</sup> follow-up</b>   | 10/17 (58.8)       | 78/107 (72.9) | 23/25 (92.0)      | 111/149 (74.5) |
| <b>N=149</b>                      |                    |               |                   |                |
| <b>2<sup>nd</sup> follow-up</b>   | 5/11 (45.5)        | 39/81 (48.2)  | 17/21 (81.0)      | 61/113 (54.0)  |
| <b>N=128</b>                      |                    |               |                   |                |
| <b>Last follow-up</b>             | 1/11 (9.1)         | 22/80 (27.5)  | 10/22 (45.5)      | 33/113 (29.2)  |
| <b>N=130</b>                      |                    |               |                   |                |

(\*) Oligo-symptomatic patients are those with symptoms enduring for less than three days or with only one symptom (anosmia/ageusia or asthenia)



1  
2  
3  
4  
5  
6  
7  
8  
9  
10  
11  
12  
13  
14  
15  
16  
17  
18  
19  
20  
21  
22  
23  
24  
25  
26  
27  
28  
29  
30  
31  
32  
33  
34  
35  
36  
37  
38  
39  
40  
41  
42  
43  
44  
45  
46  
47  
48  
49  
50  
51  
52  
53  
54  
55  
56  
57  
58  
59  
60

(\*\*) Symptomatic patients are those with one more symptom lasting at least three days and without any hospital admission

(\*\*)\* Numbers in denominators are participants available at follow-up

## Clinical follow-up

During serologic follow-up participants underwent a history examination and clinical visit. When participants were not available for clinical visit their health status and history examination of recent or past reinfection was ascertained through telephone call. None of the participants in any of the group had any sign or symptom that could be attributed to a possible clinical Sars-Cov-2 reinfection or was hospitalized upon reinfection. Since the study did not consider the PCR or antigenic test during follow-up we cannot exclude that some participants might have developed asymptomatic Sars-Cov-2 reinfection.

## Discussion

We enrolled a substantial number of subjects to whom a diagnosis of Sars-Cov-2 was made during the first pandemic episode within the area of Local Health Unit 2 of Umbria where the main hospitals to which participants had access were Foligno, Spoleto and Orvieto.

We first categorized participants according to their clinical status described clinical and therapeutic differences. Subsequently, we performed quantitative determination of anti-S and anti-N antibodies during a 12 months period follow-up and evaluated the trend of both antibodies and their correlation with the severity of disease. Our study showed a positive correlation between severity of symptoms and both anti-N and anti-S titers. Anti-N antibodies titers resulted significantly higher in those participants that had severe symptoms than those who had less significant symptoms, but declined consistently over time though 46% of hospital admitted participants showed anti-N titers persistently above the threshold even after 12 months of follow-up.

Anti-S antibody response was significantly higher in patients who had noteworthy symptoms. In particular, subjects that were admitted to hospital showed significant levels of antibody titer with a median that was higher than 100 U/ml compared to participants who belong to the other two groups and such results persisted consistently during the entire period of follow-up.

Despite initial reports that persistence of antibody against SARS-Cov-2 was limited to a few months[15], in agreement with our conclusion, several subsequent studies reported that antibodies against SARS-CoV-2 persist over time [16-24]. In a prospective longitudinal cohort study Harris et al[16] found that anti-N antibodies were detected first but declined rapidly and predicted their negativity within one year whereas anti-S antibodies persisted for 6 months and the authors predicted stability over 54 weeks which our longitudinal assessment was able to confirm. More recently, He et al[25] found that neutralizing antibodies developed in approximately 40% of a cohort of 9500 individuals and the titers of neutralizing antibodies did not significantly decrease during the 9 months of observation. Similarly, Favresse *et al*, found stable antibody titers over a

1  
2  
3 period of 10 months with the highest positivity rates in patients with clinically significant past  
4  
5 SARS-CoV-2 infection[26].  
6

7  
8 Since published data report of possible reinfection with Sars-Cov-2[27-29], we aimed also to follow  
9  
10 participants clinically as well as in terms of history examination in order to explore possible recent  
11  
12 or current clinical reinfection or hospital admission upon infection. Interestingly, none of the  
13  
14 participants showed clinically manifested reinfection. We are unsure however whether some of the  
15  
16 participants might have developed asymptomatic SARS-Cov-2 infection as this is a possible event  
17  
18 that has been reported in the literature[29].  
19

20  
21 On the other hand, we find that 32% of serologically positive participants at the initial visit, showed  
22  
23 a significant increase in the antibody titers during the subsequent pandemic infection. Hence, we  
24  
25 speculate that this increase could have been due to the spread of a new infection and that these  
26  
27 subjects did not develop the disease due to the protective effect of anti-S antibodies. Despite our  
28  
29 speculation, a growing number of studies are showing that natural infection does protect against  
30  
31 SARS-CoV-2 reinfection and/or symptomatic disease[27, 28, 30-32].  
32  
33  
34  
35

### 36 **Strength and limitation**

37  
38 Strengths of our study include a follow-up that lasted for at least one year and the use of both types  
39  
40 of serological assays for the understanding of antibody characteristics.  
41

42  
43 We acknowledge some limitations of our study. First, our study does not have a baseline serologic  
44  
45 testing since it was conceived in late April and it was not possible to obtain serologic testing when  
46  
47 participants had the disease. The time from disease onset and the first clinical and serologic testing  
48  
49 was 3 to 6 months. We believe that this could not have biased our results, however, we are unsure  
50  
51 whether those that resulted negative at the first visit – who predominately were oligo/asymptomatic  
52  
53 participants – could have positive result on the first visit. Second, the study lacks clinical and  
54  
55 serological information regarding those who died during the pandemic event, hence we are unable  
56  
57 to conclude whether quantitative serologic testing could predict survival.  
58  
59  
60

## Conclusion

Immunologic response from Sars-Cov-2 infection is characterized by both anti N and anti-S antibodies. Anti-N antibodies do not persist overtime but they can be useful for the diagnosis of recent Sars-Cov-2 infection. Anti-S antibody titers correlate with disease severity and persist for at least one year.

For peer review only

**Contributors** IA and MM conceived the original idea of the study. IA, PE, AG, EP, SP, RA, SA, AF, EM, LA, PM, MLO, MR, MB, EB, and MM: participated in the data analysis and interpretation, drafted and critically revised the final version of the manuscript. IA, AG, EP, SP, RA, LA, PM, MR, MB, EB, and MM: supervised the laboratory analysis. IA, AG, EP, SP, RA, LA, PM, MR, MB, EB, and MM: participated in the data collection. MM is the guarantor.

**Acknowledgements** We would like to thank all the participants for their dedication. We are indebted to the following personnel who collaborated in recruiting and assisting the participants as well as those who helped collecting blood sample: Luana Falchi, Loris Taschini, Arianna Fringuello, Francesca Malagoli, Luciana Di Cintio, Fabiano Pastorelli, Isabella Giaggiolo, Paolo Cappelletti and Daniela La Manna

**Funding** This research received no specific grant from any funding agency in the public, commercial or not-for-profit sectors.

**Competing interests:** None declared.

**Data availability:** No additional data available

**Collaborators** Alessandra De Masi, Manuela Costantini, Anna Chiara Lombardo, Anna Rita Vecchiarelli, Miria Flaviani, Carla Merigiola

## Figure legends

**Figure 1.** Study screening process

**Figure 2.** Duration (in days) of signs and symptoms across the three groups of participants.

Numbers in denominators are participants available at follow-up

Oligo-symptomatic patients are those with symptoms enduring for less than three days or with only one symptom (anosmia/ageusia or asthenia)

Symptomatic patients are those with one more symptom lasting at least three days and without any hospital admission

**Figure 3.** Ab-anti-S titer across the three groups of participants compared across the three periods of follow-up (estimated means and 95%CI).

Oligo-symptomatic patients are those with symptoms enduring for less than three days or with only one symptom (anosmia/ageusia or asthenia)

Symptomatic patients are those with one more symptom lasting at least three days and without any hospital admission

**Figure 4.** Ab-anti-N titer across the three groups of participants compared across the three periods of follow-up (estimated means and 95%CI).

Oligo-symptomatic patients are those with symptoms enduring for less than three days or with only one symptom (anosmia/ageusia or asthenia)

Symptomatic patients are those with one more symptom lasting at least three days and without any hospital admission

## Reference

1. Domenico, M., et al., Research Square, 2021.
2. Oran, D.P. and E.J. Topol, *Prevalence of Asymptomatic SARS-CoV-2 Infection*. *Annals of Internal Medicine*, 2020. **173**(5): p. 362-367.
3. Mizumoto, K., et al., *Estimating the asymptomatic proportion of coronavirus disease 2019 (COVID-19) cases on board the Diamond Princess cruise ship, Yokohama, Japan, 2020*. *Eurosurveillance*, 2020. **25**(10): p. 2000180.
4. Woloshin, S., N. Patel, and A.S. Kesselheim, *False Negative Tests for SARS-CoV-2 Infection - Challenges and Implications*. *N Engl J Med*, 2020. **383**(6): p. e38.
5. Sullivan, P.S., et al., *Detection of SARS-CoV-2 RNA and Antibodies in Diverse Samples: Protocol to Validate the Sufficiency of Provider-Observed, Home-Collected Blood, Saliva, and Oropharyngeal Samples*. *JMIR Public Health Surveill*, 2020. **6**(2): p. e19054.
6. Kopel, J., H. Goyal, and A. Perisetti, *Antibody tests for COVID-19*. *Proceedings (Baylor University Medical Center)*, 2020. **34**(1): p. 63-72.
7. Qiu, M., et al., *Antibody responses to individual proteins of SARS coronavirus and their neutralization activities*. *Microbes Infect*, 2005. **7**(5-6): p. 882-9.
8. Yan, Y., L. Chang, and L. Wang, *Laboratory testing of SARS-CoV, MERS-CoV, and SARS-CoV-2 (2019-nCoV): Current status, challenges, and countermeasures*. *Rev Med Virol*, 2020. **30**(3): p. e2106.
9. Deeks, J.J., et al., *Antibody tests for identification of current and past infection with SARS-CoV-2*. *Cochrane Database of Systematic Reviews*, 2020(6).
10. To, K.K.-W., et al., *Temporal profiles of viral load in posterior oropharyngeal saliva samples and serum antibody responses during infection by SARS-CoV-2: an observational cohort study*. *The Lancet Infectious diseases*, 2020: p. S1473-3099(20)30196-1.
11. Diagnostics, A., *SARS-CoV-2 IgG For Use With ARCHITECT*. 2020.
12. Chew, K.L., et al., *Clinical evaluation of serological IgG antibody response on the Abbott Architect for established SARS-CoV-2 infection*. *Clin Microbiol Infect*, 2020. **26**(9): p. 1256.e9-1256.e11.
13. Bryan, A., et al., *Performance Characteristics of the Abbott Architect SARS-CoV-2 IgG Assay and Seroprevalence in Boise, Idaho*. *Journal of clinical microbiology*, 2020. **58**(8): p. e00941-20.
14. S.p.A., D., *LIAISON®SARS-CoV-2 S1/S2 IgG package insert 2020-04*. 2020.
15. Seow, J., et al., *Longitudinal observation and decline of neutralizing antibody responses in the three months following SARS-CoV-2 infection in humans*. *Nat Microbiol*, 2020. **5**(12): p. 1598-1607.
16. Harris, R.J., et al., *Serological surveillance of SARS-CoV-2: Six-month trends and antibody response in a cohort of public health workers*. *J Infect*, 2021. **82**(5): p. 162-169.
17. Martínez, P.T., et al., *SARS-CoV-2 IgG seropositivity in a cohort of 449 non-hospitalized individuals during Spanish COVID-19 lockdown*. *Scientific Reports*, 2021. **11**(1): p. 21612.
18. Legros, V., et al., *A longitudinal study of SARS-CoV-2-infected patients reveals a high correlation between neutralizing antibodies and COVID-19 severity*. *Cellular & Molecular Immunology*, 2021. **18**(2): p. 318-327.
19. Griffante, G., et al., *Persistence of Neutralizing Antibodies to SARS-CoV-2 in First Wave Infected Individuals at Ten Months Post-Infection: The UnIRSA Cohort Study*. *Viruses*, 2021. **13**(11): p. 2270.
20. Cervia, C., et al., *Systemic and mucosal antibody responses specific to SARS-CoV-2 during mild versus severe COVID-19*. *J Allergy Clin Immunol*, 2021. **147**(2): p. 545-557.e9.
21. Dogan, M., et al., *SARS-CoV-2 specific antibody and neutralization assays reveal the wide range of the humoral immune response to virus*. *Communications Biology*, 2021. **4**(1): p. 129.
22. Rijkers, G., et al., *Differences in Antibody Kinetics and Functionality Between Severe and Mild Severe Acute Respiratory Syndrome Coronavirus 2 Infections*. *J Infect Dis*, 2020. **222**(8): p. 1265-1269.
23. Garcia-Beltran, W.F., et al., *COVID-19-neutralizing antibodies predict disease severity and survival*. *Cell*, 2021. **184**(2): p. 476-488.e11.
24. Wajnberg, A., et al., *Robust neutralizing antibodies to SARS-CoV-2 infection persist for months*. *Science (New York, N.Y.)*, 2020. **370**(6521): p. 1227-1230.

1  
2  
3  
4  
5  
6  
7  
8  
9  
10  
11  
12  
13  
14  
15  
16  
17  
18  
19  
20  
21  
22  
23  
24  
25  
26  
27  
28  
29  
30  
31  
32  
33  
34  
35  
36  
37  
38  
39  
40  
41  
42  
43  
44  
45  
46  
47  
48  
49  
50  
51  
52  
53  
54  
55  
56  
57  
58  
59  
60

25. He, Z., et al., *Seroprevalence and humoral immune durability of anti-SARS-CoV-2 antibodies in Wuhan, China: a longitudinal, population-level, cross-sectional study*. *The Lancet*, 2021. **397**(10279): p. 1075-1084.
26. Favresse, J., et al., *Persistence of anti-sars-cov-2 antibodies depends on the analytical kit: A report for up to 10 months after infection*. *Microorganisms*, 2021. **9**(3): p. 1-13.
27. Sheehan, M.M., A.J. Reddy, and M.B. Rothberg, *Reinfection Rates among Patients who Previously Tested Positive for COVID-19: a Retrospective Cohort Study*. *Clin Infect Dis*, 2021.
28. Hansen, C.H., et al., *Assessment of protection against reinfection with SARS-CoV-2 among 4 million PCR-tested individuals in Denmark in 2020: a population-level observational study*. *Lancet*, 2021. **397**(10280): p. 1204-1212.
29. Flacco, M.E., et al., *Rate of reinfections after SARS-CoV-2 primary infection in the population of an Italian province: a cohort study*. *J Public Health (Oxf)*, 2021.
30. Lumley, S.F., et al., *Antibody Status and Incidence of SARS-CoV-2 Infection in Health Care Workers*. *N Engl J Med*, 2021. **384**(6): p. 533-540.
31. Pilz, S., et al., *SARS-CoV-2 re-infection risk in Austria*. *Eur J Clin Invest*, 2021. **51**(4): p. e13520.
32. Krammer, F., *Correlates of protection from SARS-CoV-2 infection*. *Lancet (London, England)*, 2021. **397**(10283): p. 1421-1423.

**Figure 1.** Study screening process

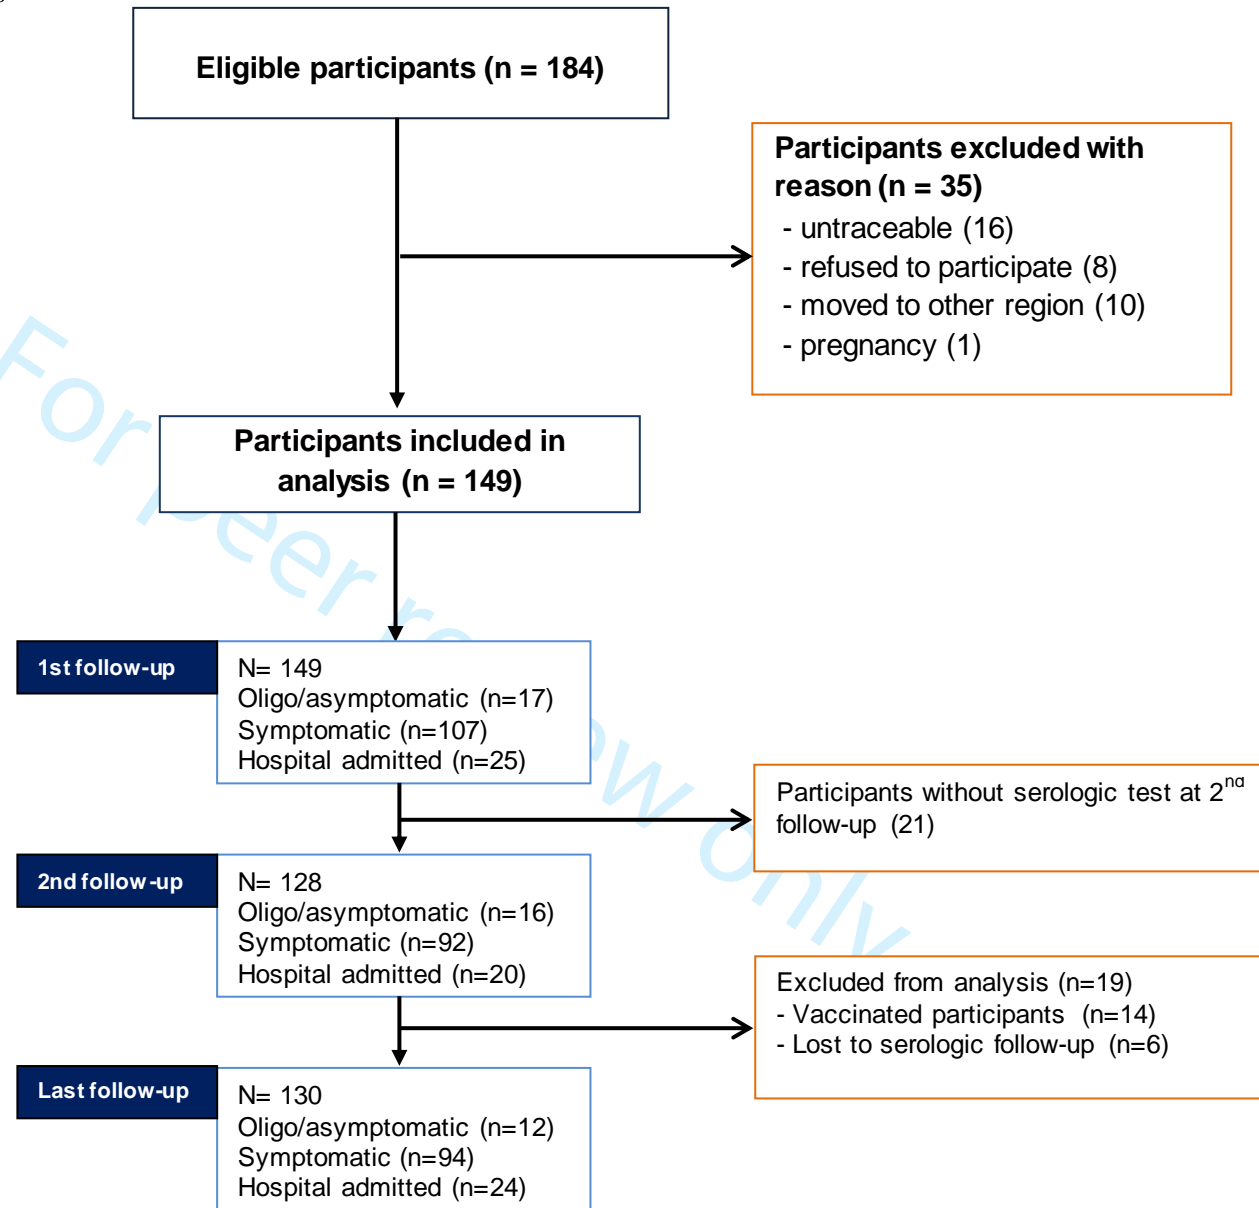



1  
2  
3  
4  
5  
6  
7  
8  
9  
10  
11  
12  
13  
14  
15  
16  
17  
18  
19  
20  
21  
22  
23  
24  
25  
26  
27  
28  
29  
30  
31  
32  
33  
34  
35  
36  
37  
38  
39  
40  
41  
42  
43  
44  
45  
46  
47  
48  
49  
50  
51  
52  
53  
54  
55  
56  
57  
58  
59  
60

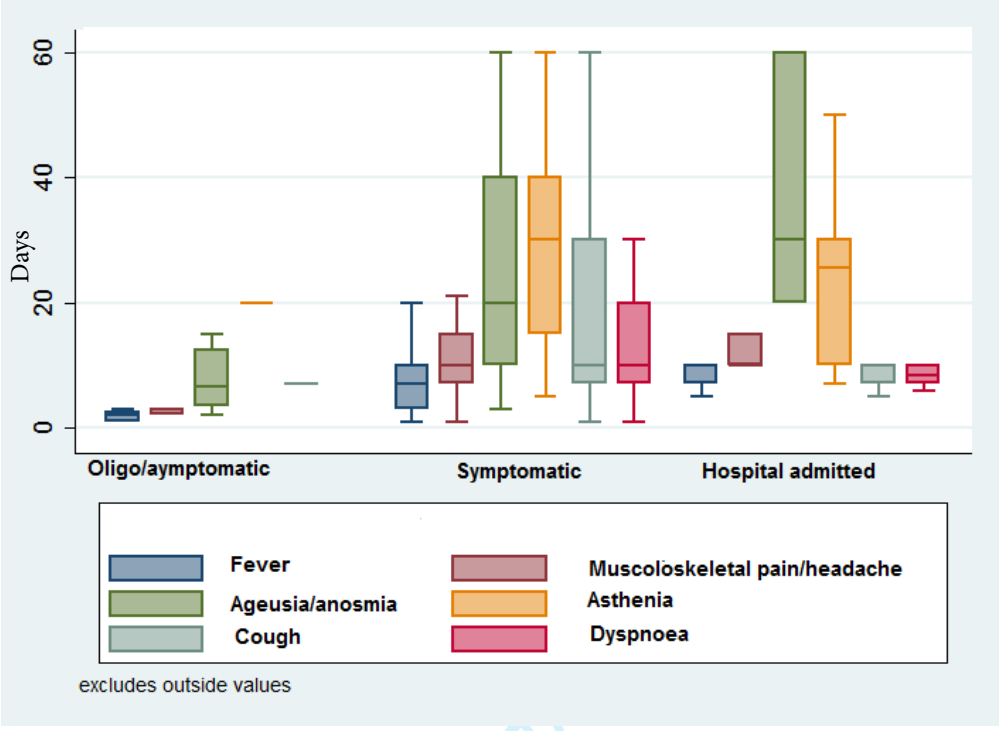

er review only

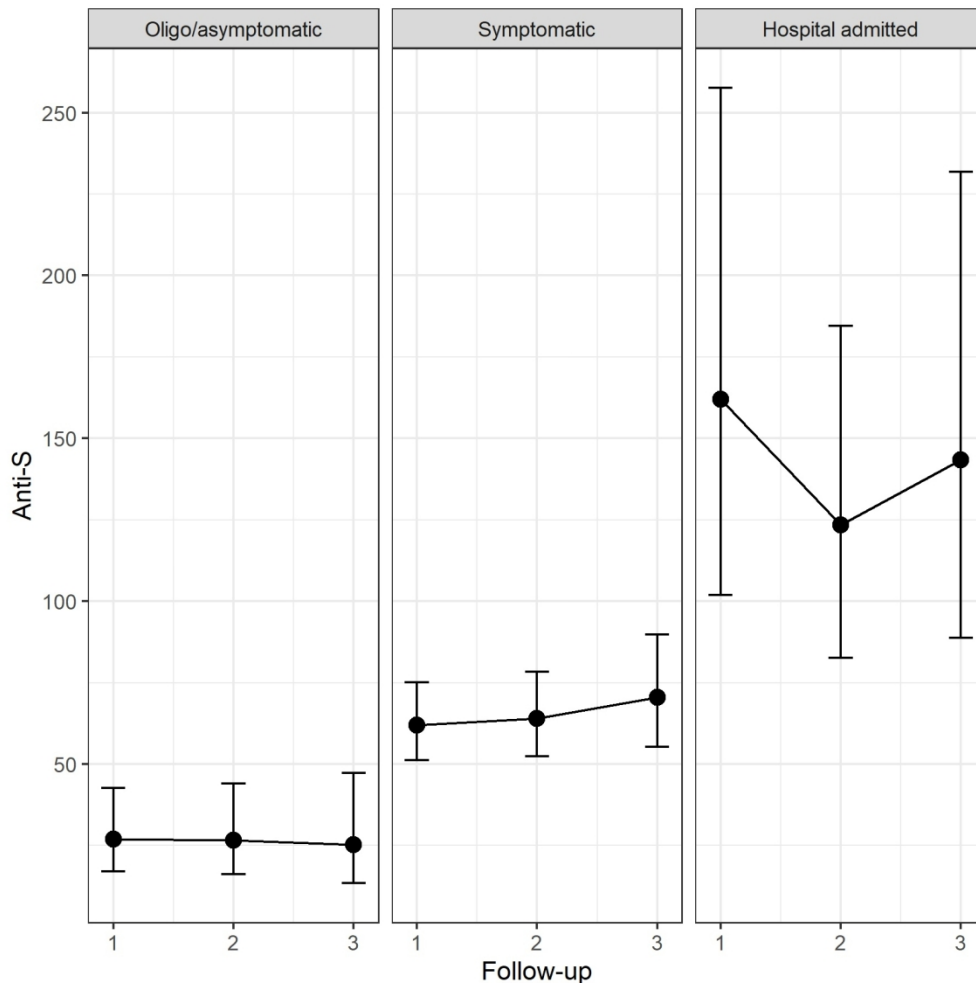

Ab-anti-S titer across the three groups of participants compared across the three periods of follow-up (estimated means and 95%CI).  
 Oligo-symptomatic patients are those with symptoms enduring for less than three days or with only one symptom (anosmia/ageusia or asthenia)  
 Symptomatic patients are those with one more symptom lasting at least three days and without any hospital admission

152x152mm (300 x 300 DPI)

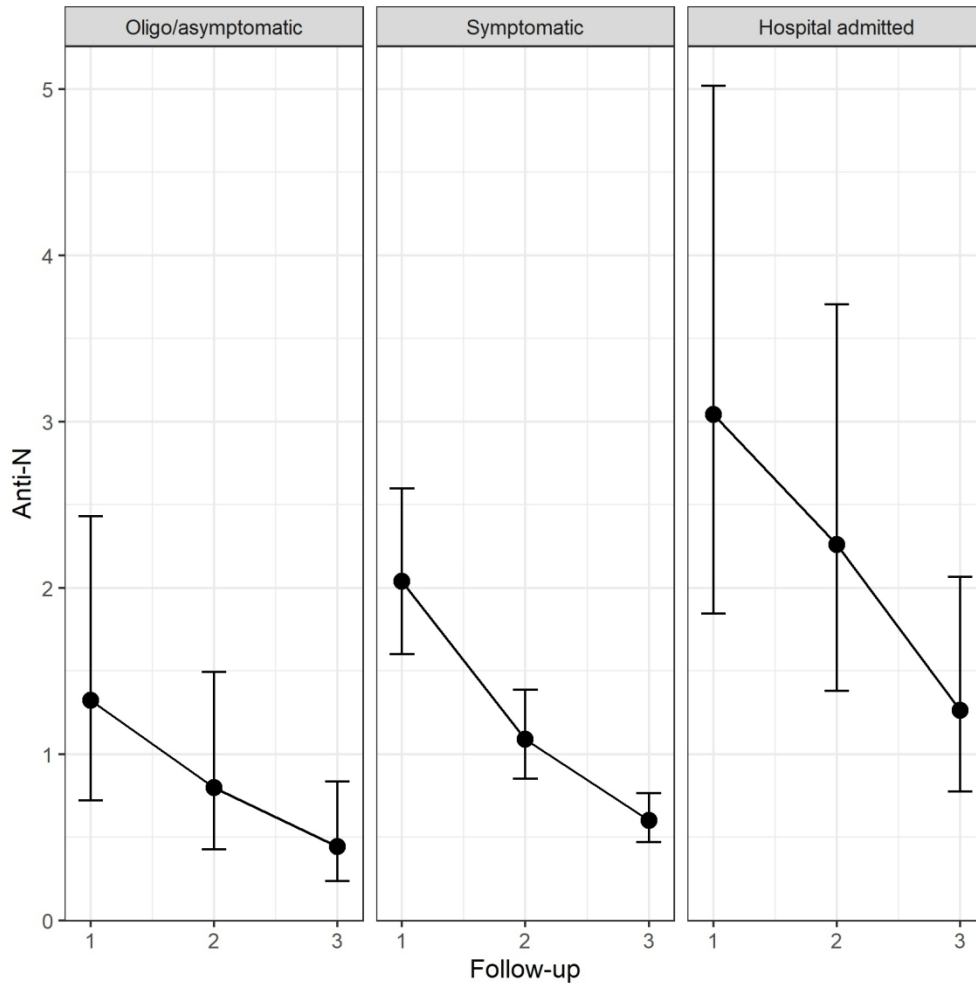

Ab-anti-N titer across the three groups of participants compared across the three periods of follow-up (estimated means and 95%CI).  
 Oligo-symptomatic patients are those with symptoms enduring for less than three days or with only one symptom (anosmia/ageusia or asthenia)  
 Symptomatic patients are those with one more symptom lasting at least three days and without any hospital admission

152x152mm (300 x 300 DPI)

STROBE Statement—Checklist of items that should be included in reports of *cross-sectional studies*

|                              | Item No | Recommendation                                                                                                                                                                                    | Page No                                  |
|------------------------------|---------|---------------------------------------------------------------------------------------------------------------------------------------------------------------------------------------------------|------------------------------------------|
| <b>Title and abstract</b>    | 1       | (a) Indicate the study's design with a commonly used term in the title or the abstract                                                                                                            | 1                                        |
|                              |         | (b) Provide in the abstract an informative and balanced summary of what was done and what was found                                                                                               | 1, 2                                     |
| <b>Introduction</b>          |         |                                                                                                                                                                                                   |                                          |
| Background/rationale         | 2       | Explain the scientific background and rationale for the investigation being reported                                                                                                              | 3, 4                                     |
| Objectives                   | 3       | State specific objectives, including any prespecified hypotheses                                                                                                                                  | 4                                        |
| <b>Methods</b>               |         |                                                                                                                                                                                                   |                                          |
| Study design                 | 4       | Present key elements of study design early in the paper                                                                                                                                           | 5                                        |
| Setting                      | 5       | Describe the setting, locations, and relevant dates, including periods of recruitment, exposure, follow-up, and data collection                                                                   | 5                                        |
| Participants                 | 6       | (a) Give the eligibility criteria, and the sources and methods of selection of participants                                                                                                       | 5                                        |
| Variables                    | 7       | Clearly define all outcomes, exposures, predictors, potential confounders, and effect modifiers. Give diagnostic criteria, if applicable                                                          | 5, 6                                     |
| Data sources/<br>measurement | 8*      | For each variable of interest, give sources of data and details of methods of assessment (measurement). Describe comparability of assessment methods if there is more than one group              | 5, 6                                     |
| Bias                         | 9       | Describe any efforts to address potential sources of bias                                                                                                                                         | 6                                        |
| Study size                   | 10      | Explain how the study size was arrived at                                                                                                                                                         | all available participants were included |
| Quantitative variables       | 11      | Explain how quantitative variables were handled in the analyses. If applicable, describe which groupings were chosen and why                                                                      | 6, 7                                     |
| Statistical methods          | 12      | (a) Describe all statistical methods, including those used to control for confounding                                                                                                             | 6, 7                                     |
|                              |         | (b) Describe any methods used to examine subgroups and interactions                                                                                                                               | 6, 7                                     |
|                              |         | (c) Explain how missing data were addressed                                                                                                                                                       | 6, 7                                     |
|                              |         | (d) If applicable, describe analytical methods taking account of sampling strategy                                                                                                                | all available participants were included |
|                              |         | (e) Describe any sensitivity analyses                                                                                                                                                             | 6, 7                                     |
| <b>Results</b>               |         |                                                                                                                                                                                                   |                                          |
| Participants                 | 13*     | (a) Report numbers of individuals at each stage of study—eg numbers potentially eligible, examined for eligibility, confirmed eligible, included in the study, completing follow-up, and analysed | 8                                        |
|                              |         | (b) Give reasons for non-participation at each stage                                                                                                                                              | 8                                        |
|                              |         | (c) Consider use of a flow diagram                                                                                                                                                                | 8                                        |
| Descriptive data             | 14*     | (a) Give characteristics of study participants (eg demographic, clinical, social) and information on exposures and potential                                                                      | 8, 9                                     |

|                          |     |                                                                                                                                                                                                              |        |
|--------------------------|-----|--------------------------------------------------------------------------------------------------------------------------------------------------------------------------------------------------------------|--------|
|                          |     | confounders                                                                                                                                                                                                  |        |
|                          |     | (b) Indicate number of participants with missing data for each variable of interest                                                                                                                          | 8, 9   |
| Outcome data             | 15* | Report numbers of outcome events or summary measures                                                                                                                                                         | 8 – 13 |
| Main results             | 16  | (a) Give unadjusted estimates and, if applicable, confounder-adjusted estimates and their precision (eg, 95% confidence interval). Make clear which confounders were adjusted for and why they were included | 8 – 13 |
|                          |     | (b) Report category boundaries when continuous variables were categorized                                                                                                                                    |        |
|                          |     | (c) If relevant, consider translating estimates of relative risk into absolute risk for a meaningful time period                                                                                             |        |
| Other analyses           | 17  | Report other analyses done—eg analyses of subgroups and interactions, and sensitivity analyses                                                                                                               | 10-11  |
| <b>Discussion</b>        |     |                                                                                                                                                                                                              |        |
| Key results              | 18  | Summarise key results with reference to study objectives                                                                                                                                                     | 14     |
| Limitations              | 19  | Discuss limitations of the study, taking into account sources of potential bias or imprecision. Discuss both direction and magnitude of any potential bias                                                   | 15     |
| Interpretation           | 20  | Give a cautious overall interpretation of results considering objectives, limitations, multiplicity of analyses, results from similar studies, and other relevant evidence                                   | 14-15  |
| Generalisability         | 21  | Discuss the generalisability (external validity) of the study results                                                                                                                                        | 15-16  |
| <b>Other information</b> |     |                                                                                                                                                                                                              |        |
| Funding                  | 22  | Give the source of funding and the role of the funders for the present study and, if applicable, for the original study on which the present article is based                                                | 17     |

\*Give information separately for exposed and unexposed groups.

**Note:** An Explanation and Elaboration article discusses each checklist item and gives methodological background and published examples of transparent reporting. The STROBE checklist is best used in conjunction with this article (freely available on the Web sites of PLoS Medicine at <http://www.plosmedicine.org/>, Annals of Internal Medicine at <http://www.annals.org/>, and Epidemiology at <http://www.epidem.com/>). Information on the STROBE Initiative is available at [www.strobe-statement.org](http://www.strobe-statement.org).
